# Supplementary material for: FARNA: knowledgebase of inferred functions of non-coding RNA transcripts
Source: PubMed Central journal article supplement — Nucleic Acids Res. 2016 Oct 24;45(5):2838–48. doi: 10.1093/nar/gkw973 (PMC5389649; doi:10.1093/nar/gkw973), 2016-10-24
Supplement: gkw973_Supp.pdf [file gkw973_Supp.pdf]

**FARNA: Database of Function Annotation of human non-coding RNA transcripts**

Home Statistics Links Help Team Contact malat1 Search

Number of transcript-sample pairs found: 586 query was: malat1

Filter annotations with query terms: FDR filter: 0.05

**a.** malat1

**b.** Adipose (2)

**c.** malat1 AND tissue:"ADIPOSE"

**d.** Pivot table (tissue)

**e.**

**Attribution filters:**

RNA types (ttranscript-sample pairs, lunique transcripts)

- Incrna (586, 2)
- 119 Tissues (ttranscript-sample pairs)
  - adipose (2)
  - adipose (2)
  - amygdala adult (2)
  - aorta (2)
  - appendix (2)
- 177 Primary cells (ttranscript-sample pairs)
  - adipocyte breast (2)
  - adipocyte omental (2)
  - adipocyte perirenal (2)
  - adipocyte subcutaneous (2)

RNA Id      Ensembl Gene Id      Gene Names

| RNA Id                                 | Ensembl Gene Id | Gene Names                                                           |
|----------------------------------------|-----------------|----------------------------------------------------------------------|
| ENST00000544868.1                      |                 | (gene view)                                                          |
| sample: common myeloid progenitor cnp  | ENSG00000251562 | MALAT1, PRO1073, MALAT-1, NCRNA00047, HCN, NEAT2, LINC00047, mascRNA |
| (transcript view)                      |                 |                                                                      |
| (transcript view in query context)     |                 |                                                                      |
| - Pathways                             |                 | 2 annotations                                                        |
| - Diseases                             |                 | 12 annotations                                                       |
| ENST00000544868.1                      |                 | (gene view)                                                          |
| sample: smooth muscle cells intestinal | ENSG00000251562 | MALAT1, PRO1073, MALAT-1, NCRNA00047, HCN, NEAT2, LINC00047, mascRNA |
| (transcript view)                      |                 |                                                                      |
| (transcript view in query context)     |                 |                                                                      |
| - GO Biological Process                |                 | 2 annotations                                                        |
| - GO Cellular Component                |                 | 1 annotation                                                         |

malat1 AND tissue:"ADIPOSE"

Number of transcript-sample pairs found: 2 query was: malat1 AND tissue:"ADIPOSE"

Filter annotations with query terms: FDR filter: 0.05

**c.**

**Attribution filters:**

RNA types (ttranscript-sample pairs, lunique transcripts)

- Incrna (2, 2)
- 1 Tissues (ttranscript-sample pairs)
  - adipose (2)
- 84 Annotations (ttranscript-sample pairs)
  - Rheumatoid arthritis (2)
  - Eye cancer (2)
  - Leukencephalopathy (2)
  - Renal tubular acidosis (2)
  - Iiver development (2)
  - PML body (2)
  - B cell differentiation (2)

RNA Id      Ensembl Gene Id      Gene Names

| RNA Id                             | Ensembl Gene Id | Gene Names                                                           |
|------------------------------------|-----------------|----------------------------------------------------------------------|
| ENST00000544868.1                  |                 | (gene view)                                                          |
| sample: adipose                    | ENSG00000251562 | MALAT1, PRO1073, MALAT-1, NCRNA00047, HCN, NEAT2, LINC00047, mascRNA |
| (transcript view)                  |                 |                                                                      |
| (transcript view in query context) |                 |                                                                      |
| - GO Biological Process            |                 | 3 annotations                                                        |
| - GO Molecular Function            |                 | 3 annotations                                                        |
| - GO Cellular Component            |                 | 1 annotation                                                         |
| - Pathways                         |                 | 6 annotations                                                        |
| - Diseases                         |                 | 16 annotations                                                       |
| - Transcription Factors            |                 | 82 factors                                                           |
| - Transcription Cofactors          |                 | 36 cofactors                                                         |
| ENST00000544868.1                  |                 | (gene view)                                                          |
| sample: adipose                    | ENSG00000251562 | MALAT1, PRO1073, MALAT-1, NCRNA00047, HCN, NEAT2, LINC00047, mascRNA |
| (transcript view)                  |                 |                                                                      |
| (transcript view in query context) |                 |                                                                      |

**Attribution filters:**

RNA types (ttranscript-sample pairs, lunique transcripts)

- Incrna (2, 2)
- 1 Tissues (ttranscript-sample pairs)
  - adipose (2)
- 84 Annotations (ttranscript-sample pairs)
  - Diseases (39)
  - Pathways (22)
  - GO Biological Process (16)
  - GO Molecular Function (4)
  - GO Cellular Component (3)

RNA Id      Ensembl Gene Id      Gene Names

| RNA Id                             | Ensembl Gene Id | Gene Names                                                           |
|------------------------------------|-----------------|----------------------------------------------------------------------|
| ENST00000544868.1                  |                 | (gene view)                                                          |
| sample: adipose                    | ENSG00000251562 | MALAT1, PRO1073, MALAT-1, NCRNA00047, HCN, NEAT2, LINC00047, mascRNA |
| (transcript view)                  |                 |                                                                      |
| (transcript view in query context) |                 |                                                                      |
| - GO Biological Process            |                 | 15 annotations                                                       |
| - GO Molecular Function            |                 | 1 annotation                                                         |
| - GO Cellular Component            |                 | 3 annotations                                                        |
| - Pathways                         |                 | 19 annotations                                                       |
| - Diseases                         |                 | 32 annotations                                                       |
| - Transcription Factors            |                 | 103 factors                                                          |
| - Transcription Cofactors          |                 | 33 cofactors                                                         |
| ENST00000544868.1                  |                 | (gene view)                                                          |

**Pivot table (tissue)**

| Annotation Id              | Annotation             | Transcript | ENST00000544868.1 | LINC0000047 | NCNA00047 | HCN  | NEAT2 |
|----------------------------|------------------------|------------|-------------------|-------------|-----------|------|-------|
| Pathways (22)              | Pathways               | Transcript | 0.00              | 0.00        | 0.00      | 0.00 | 0.00  |
| Diseases (39)              | Diseases               | Transcript | 0.00              | 0.00        | 0.00      | 0.00 | 0.00  |
| GO Biological Process (16) | GO Biological Process  | Transcript | 0.00              | 0.00        | 0.00      | 0.00 | 0.00  |
| GO Molecular Function (4)  | GO Molecular Function  | Transcript | 0.00              | 0.00        | 0.00      | 0.00 | 0.00  |
| GO Cellular Component (3)  | GO Cellular Component  | Transcript | 0.00              | 0.00        | 0.00      | 0.00 | 0.00  |
| Annotations (84)           | Annotations            | Transcript | 0.00              | 0.00        | 0.00      | 0.00 | 0.00  |
| Rheumatoid arthritis (2)   | Rheumatoid arthritis   | Transcript | 0.00              | 0.00        | 0.00      | 0.00 | 0.00  |
| Eye cancer (2)             | Eye cancer             | Transcript | 0.00              | 0.00        | 0.00      | 0.00 | 0.00  |
| Leukencephalopathy (2)     | Leukencephalopathy     | Transcript | 0.00              | 0.00        | 0.00      | 0.00 | 0.00  |
| Renal tubular acidosis (2) | Renal tubular acidosis | Transcript | 0.00              | 0.00        | 0.00      | 0.00 | 0.00  |
| Iiver development (2)      | Iiver development      | Transcript | 0.00              | 0.00        | 0.00      | 0.00 | 0.00  |
| PML body (2)               | PML body               | Transcript | 0.00              | 0.00        | 0.00      | 0.00 | 0.00  |
| B cell differentiation (2) | B cell differentiation | Transcript | 0.00              | 0.00        | 0.00      | 0.00 | 0.00  |

Supplementary Figure S1: This figure demonstrates how a user can find predicted function of MALAT1 in a tissue. Figures are ordered in clock-wise manner.

- Type "malat1" in search box
- Select a tissue of interest. We select "adipose".
- Click "gene view"
- Click "Pivot Table" to view result
- Final result of pivot table

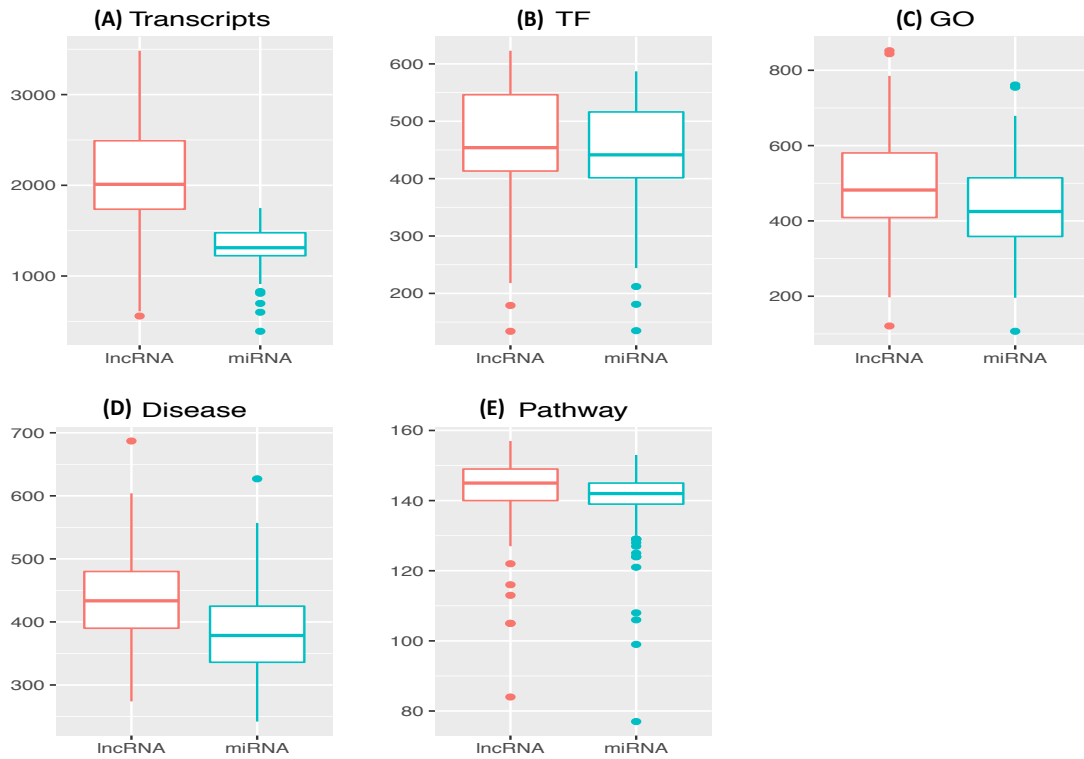

**Supplementary Figure S2: This figures summarizes the statistics of FARNA from different perspective.**  
**(A)** This figure shows the number of RNA transcripts expressed in different cells/tissues.  
**(B)** This figure shows the number of unique TFs involved in different cells/tissues regulating the RNA transcripts.  
**(C)** This figure shows the number of statistically significant unique GO terms in different cells/tissues.  
**(D)** This figure shows the number of statistically significant unique disease terms in different cells/tissues.  
**(E)** This figure shows the number of statistically significant unique pathways in different cells/tissues.

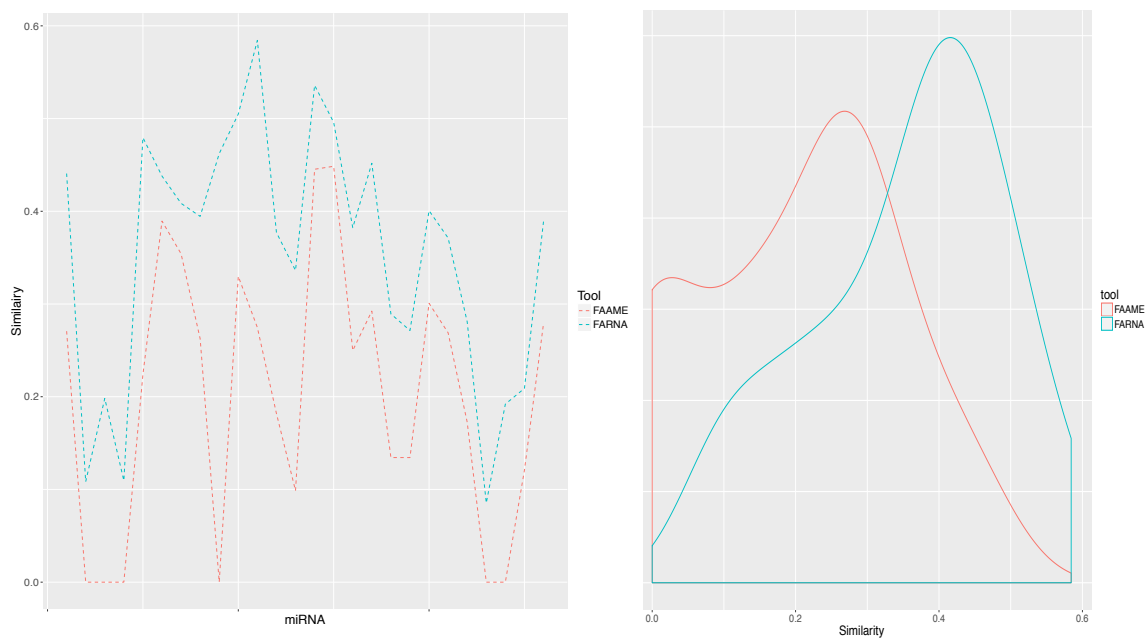

**Supplementary Figure S3: Comparison of predictions from FARNA and FAME against known miRNA annotations from AMIGO based on semantic similarity. We used Lin's similarity measure with Resnik information content with best matching average (bma) option from "The semantic measures library and toolkit".**

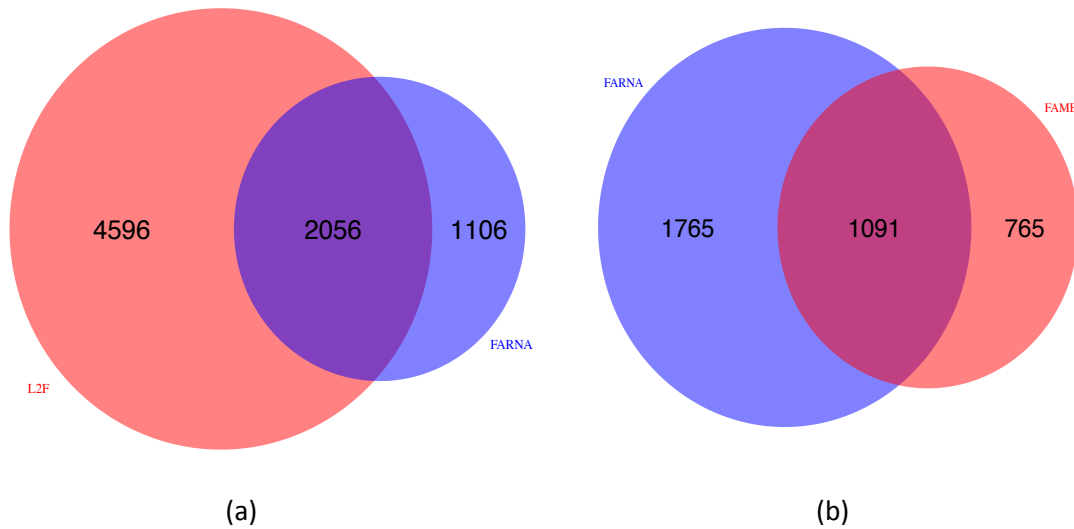

**Supplementary Figure S4: Overlap of GO terms annotations for FARNA, FAME and LncRNA2Function (L2F).** (a) This figure shows the overlap of GO term annotations provided by FARNA and LncRNA2Function (L2F). It shows that LncRNA2Function covers 65.02% of annotations provided by FARNA, and 30.90% annotations of LncRNA2Function are covered by FARNA. (b) This figure shows the overlap of GO term annotations provided by FARNA and FAME. It shows that 38.20% of annotations provided by FARNA are covered by FAME, and 58.78% annotations of FAME are covered by FARNA

**Supplementary Table S1.** Evidence form miRNAs and lncRNAs to validate the predictions from FARNA

| <b>Gene/Transcript</b> | <b>Comparison between known evidences and FARNA demonstrations</b>                                                                                                                                                                                                                                                                                                                                                                                                                                                                                                                                                                                                                                                                                                                                                                                                                                                                                                                                                                                                                                                                                                                                                                                                                                                                                                                                                                                                                                                                                                                                                                                                                                                    |
|------------------------|-----------------------------------------------------------------------------------------------------------------------------------------------------------------------------------------------------------------------------------------------------------------------------------------------------------------------------------------------------------------------------------------------------------------------------------------------------------------------------------------------------------------------------------------------------------------------------------------------------------------------------------------------------------------------------------------------------------------------------------------------------------------------------------------------------------------------------------------------------------------------------------------------------------------------------------------------------------------------------------------------------------------------------------------------------------------------------------------------------------------------------------------------------------------------------------------------------------------------------------------------------------------------------------------------------------------------------------------------------------------------------------------------------------------------------------------------------------------------------------------------------------------------------------------------------------------------------------------------------------------------------------------------------------------------------------------------------------------------|
| <b>miR-122</b>         | <p>It is also shown that miR-122 may be involved in liver damage (113). And miR-122 is involved in liver disease via IFN-alpha/beta pathways (114) and Nuclear factor-<math>\kappa</math>B (NF-<math>\kappa</math>B) system is activated in response to several stresses and may cause liver damage (113). FARNA suggest “GO:0001889 liver development”, “GO:0044255 cellular lipid metabolic process”, “GO:0038061 NIK/NF-kappaB signaling”, “GO:0033256 I-kappaB/NF-kappaB complex”, “REACT_25024 TRAF6 mediated induction of NFkB and MAP kinases upon TLR7/8 or 9 activation”, “REACT_13537 p75NTR signals via NF-kB”, REACT_22258 Metabolism of lipids and lipoproteins”, “REACT_19241 Regulation of lipid metabolism by Peroxisome proliferator-activated receptor alpha (PPARalpha)” and “REACT_25359: RIG-I/MDA5 mediated induction of IFN-alpha/beta pathways” in “liver” tissue.</p> <p>miR-122 has also been linked to skin-related diseases (115). FARNA further suggest “GAD:(KOBAS:40244) Lupus vulgaris” and “NHGRI GWAS Catalog:(KOBAS:8815) Psoriasis”.</p> <p>miR-122 has also been shown to be significantly upregulated in the serum of patients with osteoporosis [PMID: 24431276] and has been identified as a biomarker for bone diseases [PMID: 26525415]. FARNA retrieved associated annotations such as KEGG DISEASE:(KOBAS:372) Cancers of soft tissues and bone, GAD:(KOBAS:14214) Osteosarcoma and FunDO:(2188) Bone marrow disease.</p>                                                                                                                                                                                                                                                 |
| <b>miR-200</b>         | <p>miR-200 family that has been identified as biomarkers for epithelial-to-mesenchymal transition (EMT). In EMT epithelial cells morphologically and phenotypically transdifferentiate into mesenchymal cells and the major pathological process implicated in proliferative vitreoretinopathy (PVR) (116), renal fibrosis (117), cancer (118) and development (119). This miR-200 family have been demonstrated to target the E-cadherin transcriptional repressors zinc finger E-box binding homeobox 1(ZEB1) and ZEB2 for EMT (120-122).</p> <p>Some TFs such as SNAI1 and SNAI2 play a crucial role in EMT (123,124). SNAI2 indirectly regulates ZEB1 and ZEB2 by regulating the miR-200 family transcript, and in turn the miR-200 family regulates ZEB1 and ZEB2. ETS1, another TF, is a suggested upstream regulator of ZEB1 and ZEB2 (125) and has also been identified as a biomarker of EMT.</p> <p>FARNA predicts that TFs SNAI1, SNAI2, ZEB1 and ETS1 binds the miR-200a promoter region and that miR-200a is expressed in “eye vitreous humor” tissue and in “monocyte and renal epithelial cells”.</p> <p>FARNA also returns several related annotations such as GO:0048048 Embryonic eye morphogenesis; GO:0031076 embryonic camera-type eye development; REACT_11061 Signalling by NGF (126); REACT_13776 p75 NTR receptor-mediated signaling (126); FunDO:(2152) Renal tubular acidosis; GO:0072160 nephron tubule epithelial cell differentiation; REACT_6966 Toll-Like Receptors Cascades (127).</p> <p>miR-200 is shown to be involved in renal cells for EMT transition (128). FARNA annotates miR-200 in "renal epithelial cells" primary cell with "GO:0010631 epithelial cell migration".</p> |
| <b>miR-146a</b>        | <p>This miRNA is found in lung and monocytic cell line (129) and known to be involved in innate immune sensing (130). FARNA suggest “REACT_6802 Innate Immune System” in</p>                                                                                                                                                                                                                                                                                                                                                                                                                                                                                                                                                                                                                                                                                                                                                                                                                                                                                                                                                                                                                                                                                                                                                                                                                                                                                                                                                                                                                                                                                                                                          |

“lung” tissue, as well as KEGG DISEASE:(H00013) Small cell lung cancer and KEGG DISEASE:(KOBAS:762) Cancers of the lung and pleura

It has additionally been demonstrated that a G > C polymorphism (rs2910164) is located in the stem region opposite to the mature miR-146a sequence, which results in a change from G:U pair to C:U mismatch in the stem structure of miR-146a precursor (131). FARNAs predicts GO:0001889 liver development, GO:0071339 MLL1 complex, GAD:(KOBAS:34494) LIVER CIRRHOSIS, BILIARY and FunDO:(2022) Liver cancer

hsa-mir-146a is also shown to be involved in the progression of Alzheimer's disease (132,133) . FARNAs predicts “GO:0048708 astrocyte differentiation, REACT\_268456 Programmed Cell Death, REACT\_578 Apoptosis, REACT\_6890 Activated TLR4 signalling, REACT\_6894 Toll Like Receptor 4 (TLR4) Cascade, REACT\_995 Apoptotic execution phase, REACT\_1213 Apoptosis induced DNA fragmentation, GAD:(KOBAS:124) NEUROLOGICAL and FunDO:(1740) Alzheimer's disease” and show hsa-mir-146a to be highly expressed in “cd4+cd25 cd45ra memory regulatory t cells”.

hsa-mir-146a is also shown to be involved in Rheumatoid arthritis (134). FARNAs predicts “NHGRI GWAS Catalog:(KOBAS:645) Rheumatoid arthritis and GAD:(KOBAS:15804) Arthritis, psoriatic”.

**miR-155**

ELK3 was demonstrated to binds the miR-155 promoter via ChIP and quantitative polymerase chain reaction (QPCR) (135). Additionally, both hsa-miR-155 and ELK3 have been linked to the hypoxia response pathway (135). FARNAs predicts that TF ELK3 binds the hsa-miR-155 promoter region and GO:0001666 response to hypoxia

miR-155 is demonstrated to be involved in Rheumatoid arthritis (136,137). FARNAs predicts “FunDO:(1781) Rheumatoid arthritis”.

This miRNA are mainly involved in monocytic and immune system cell line (138,139). FARNAs suggest it is also expressed in “cd14+ monocyte derived endothelial”:

miR-155 is also shown to be involved in cystic fibrosis (140,141). FARNAs show hsa-miR-155 to be expressed in “fibroblast lung” cell, as well as KEGG DISEASE:(KOBAS:762) Cancers of the lung and pleura and GAD:(KOBAS:644) Lung cancer

hsa-mir-155 is shown to be involved in lymphoma (139) and FARNAs predicts “FunDO:(2239) Lymphoma” in “cd19+ b cells”, as well as GAD:(KOBAS:33584) Precursor cell lymphoblastic leukemia-lymphoma and GAD:(KOBAS:8444) Follicular lymphoma

**miR-21**

miR-21 was shown to be highly expressed in several cancer types such as colorectal cancer (142), breast cancer (143) and liver cancer (144). FARNAs returns related GO, disease and pathway annotation such as GO:0008285 negative regulation of cell proliferation; GO:0006921 cellular component disassembly involved in execution phase of apoptosis; GO:0016605 PML body and REACT\_995 Apoptotic execution phase.

FARNAs further returns 24 different types of cancer for miR-21 in different cells/tissues that include Adenoid cystic cancer, Bladder cancer, Breast cancer, Colon cancer, Colorectal cancer, Endometrial cancer, Esophageal cancer, Esophagus cancer, Eye cancer,

Gastric cancer, Kidney cancer, Liver cancer, Lung cancer, Non-small cell lung cancer, Oral cancer, Ovarian cancer, Pancreatic cancer, Penile cancer, Pituitary cancer, Prostate cancer, Small cell lung cancer, Squamous cell cancer, Stomach cancer, Thyroid cancer.

It has additionally been shown that miR-21 contributes to myocardial disease by stimulating MAP kinase signalling through SPRY1 in fibroblasts (145). Generally, patients with rheumatoid arthritis (RA) have higher levels of inflammation in their bodies, which may affect other organs and tissues besides the joints. People with RA have up to twice the risk of heart disease and development of heart failure (146). FARNA suggest “FunDO:(1781) Rheumatoid arthritis”, “GAD:(KOBAS:1134) Atherosclerosis, coronary” and “GAD:(KOBAS:33284) Coronary disease”.

miR-21 is shown to be involved in cardiac hypertrophy(147) and FARNA predicts “GAD:(KOBAS:33194) Hypertrophy, left ventricular” in “heart tricuspid valve”.

**miR-375**

miR-375 was shown to be is down-regulated in pancreatic cancer (148,149) and it has been shown that specific cofactors of SWI/SNF chromatin remodeling complex have roles in pancreatic cancer. FARNA suggest “GO:0070603 SWI/SNF superfamily-type complex” and NHGRI GWAS Catalog:(KOBAS:5145) Pancreatic cancer and also shows miR-375 (trx 2) to be highly expressed in “pancreatic” tissue.

It has also been demonstrated that miR-375 overexpression in mouse hippocampus potently reduced dendrite density. FARNA suggest miR-375 to be highly expressed in “hippocampus” tissue and predicts GO:0030425 dendrite

miR-375 is also shown to be involved in head and neck squamous cell carcinoma (HNSCC)(150) and has been identified as a microRNA that is differentially expressed between lung squamous cell carcinoma and lung adenocarcinoma. FARNA suggest miR-375 to be highly expressed in “lung” tissue and predicts KEGG DISEASE:(KOBAS:702) Head and neck cancers.

**miR-16**

miR-15 and miR-16 families have been demonstrated as transcriptional targets of E2F, which, in turn, modulates E2F activity [PMID: 21454377]. FARNA predicts that TF E2F4 binds the miR-16 promoter region.

miR-16 is being considered as a potential biomarker for predicting melanoma prognosis (150). FARNA suggest “GAD:(KOBAS:8644) Melanoma”, “KEGG DISEASE:(KOBAS:7442) Skin and soft tissue diseases” and “KEGG DISEASE:(KOBAS:7432) Skin diseases”.

miR-16 is also down-regulated during insulin resistance and controls skeletal muscle protein accretion (151). FARNA suggest “GAD:(KOBAS:34) Diabetes, type 1” and KEGG DISEASE:(H00409) Type II diabetes mellitus.

Inhibitors of the WNT pathway are being explored as a novel therapeutic target in the reversal of the age-related thymic involution (152). miR-16 exhibited differential expression in the senescent thymus (152) , and have previously been implicated in thymus involution caused by aging (153). FARNA suggest “GO:0007420 brain development” and show miR-16 to be highly expressed in “thymus” and “pituitary gland” tissue

**XIST**

XIST (<http://www.lncrnadb.org/xist/>) is known to acts as a major effector of the X

inactivation process. X inactivation is an early developmental process in mammalian females that transcriptionally silences one of the pair of X chromosomes, thus providing dosage equivalence between males and females, that is, dosage compensation (154,155). XIST RNA is expressed from inactive X-chromosome and recruit different chromatin modifier in X-chromosome. Sample collected from hippocampus shows that majority of female mouse have random X-chromosome inactivation (XCI) (156).

For XIST, in “globus pallidus” brain tissue FARNA returned the following GO terms: from Cellular Compartment: GO:0016514 SWI/SNF complex; GO:0071565 nBAF complex; GO:0071564 npBAF complex; from Biological Process: GO:0006337 nucleosome disassembly, as well KEGG DISEASE:(H00773) Non-syndromic autosomal dominant mental retardation and KEGG DISEASE:(KOBAS:302) Cancers of the breast and female genital organs.

FARNA retrieving these GO terms are reasonable as the study of dosage compensation revealed the existence of an amazing number of interacting chromatin remodeling mechanisms that affect the function of entire chromosomes. The SWI/SNF subunits were shown to play a key role in chromatin remodeling (157). Additionally, mammalian BAF complexes include SWI/SNF subunits that are altered in response to the changes in epigenetic regulation that accompany the evolution of multicellularity. Moreover, the X-chromosome has been a target in many studies looking for causes of Non-syndromic autosomal dominant mental retardation because of the high male to female ratio in the Non-syndromic autosomal dominant mental retardation population. The result is that most of the known Non-syndromic autosomal dominant mental retardation genes are X-linked (158,159). Dosage compensation is the term used to describe equalization of the expression of genes between members of different biological sexes. In humans, females (XX) silence the transcription of one X chromosome, thus having the same number of expressed X-linked genes as do males (XY) (both genders having essentially one X chromosome per cell from which to transcribe and express genes) (160,161). Dosage compensation has been shown to be involved in global rebalancing of aneuploidy genomes and aneuploidies have been associated with a variety of developmental defects and malignant aberrations such as certain breast cancers (162). Thus, it is reasonable for FARNA to retrieve sex organ-specific cancers such as “Cancers of the breast and female genital organs”.

In summary, we find that the GO terms we highlighted and KEGG Diseases actually fit quite well to the “essential role in X chromosome dosage compensation” and that the relevance of brain tissue is warranted.

#### **GAS5**

Down-regulation of GAS5 has been demonstrated to increase pancreatic cancer cell proliferation by regulating CDK6 (163). FARNA predict “GAD:(KOBAS:32574) Pancreatic neoplasms” and show GAS5 to be highly expressed in normal “pancreas” tissue.

GAS5 has also been implicated in autoimmune disease (164). FARNA predicts “REACT\_6802 Innate Immune System”, “KEGG DISEASE:(KOBAS:992) Primary immunodeficiency”, “KEGG DISEASE:(KOBAS:802) Immune system diseases” and “REACT\_75913 Nucleotide-binding domain, leucine rich repeat containing receptor (NLR) signaling pathways”.



|              |                                                                                                                                                                                                                                                                                                                                                                                                                                                                                                                                                                                                                                                                                                                                                                   |
|--------------|-------------------------------------------------------------------------------------------------------------------------------------------------------------------------------------------------------------------------------------------------------------------------------------------------------------------------------------------------------------------------------------------------------------------------------------------------------------------------------------------------------------------------------------------------------------------------------------------------------------------------------------------------------------------------------------------------------------------------------------------------------------------|
|              | <p>GAS5 is also down-regulated in breast cancer and its expression induces growth arrest and apoptosis (165). FARNA shows that GAS5 is highly expressed in “breast” tissue and it is annotated with “KEGG DISEASE:(KOBAS:302) Cancers of the breast and female genital organs”, “FunDO:(1944) Breast cancer”</p>                                                                                                                                                                                                                                                                                                                                                                                                                                                  |
| <b>PCA3</b>  | <p>PCA3 is known to be involved in prostate cancer (166). FARNA predicts “OMIM:(176807) Prostate cancer”, “GO:2000134 negative regulation of G1/S transition of mitotic cell cycle”, “GO:0043518 negative regulation of DNA damage response, signal transduction by p53 class mediator”, GO:0016605 PML body”, “GO:0051403 stress-activated MAPK cascade” and suggest PCA3 to be highly expressed in normal “prostate” and “penis” tissue.</p>                                                                                                                                                                                                                                                                                                                    |
| <b>PVT1</b>  | <p>PVT1 is shown to be involved in apoptosis inhibition in colorectal cancers (167). FARNA annotate PVT1 function in terms of "GO:0016605 PML body", “KEGG DISEASE:(H00020) Colorectal cancer”, “GO:0043066 negative regulation of apoptotic process” and “GO:0008285 negative regulation of cell proliferation”.</p> <p>PVT1 is known to be involved in type 1 diabetes (168). FARNA also predicts “KEGG DISEASE:(KOBAS:4532) Diabetes” and “FunDO:(1904) Diabetes mellitus”.</p> <p>PVT1 has also been implicated in the pathogenesis of ovarian and breast cancers (169). FARNA suggest “KEGG DISEASE:(H00027) Ovarian cancer”, “KEGG DISEASE:(KOBAS:302) Cancers of the breast and female genital organs” and show PVT1 to be expressed in breast tissue.</p> |
| <b>RMST</b>  | <p>This brain specific lncRNA interact with SOX2 and play key role in neurogenesis (170). FARNA predicted SOX2 in the TF list of RMST and predict “REACT_264135 Organelle biogenesis and maintenance”. Additionally FARNA suggest its expression in “cerebellum adult” tissue.</p> <p>RMST is known to be necessary for neuronal differentiation (170). FARNA annotated RMST in “medulla oblongata” tissue with "GO:0045595 Regulation of cell differentiation" ," GO:0030099 myeloid cell differentiation ".</p>                                                                                                                                                                                                                                                 |
| <b>H19</b>   | <p>H19 is shown to be involved in bladder cancer (171,172) and FARNA suggest “KEGG DISEASE:(KOBAS:602) Cancers of the urinary system and male genital organs” and “FunDO:(2125) Bladder cancer” disease in “bladder” tissue.</p> <p>This lncRNA is an oncogene and tumor suppressor (173). It is shown to be involved in embryonic growth and development(174). FARNA suggest “REACT_111045 Developmental Biology”, “GO:0043588 skin development”, “GO:0000578 embryonic axis specification”, “GO:0048596 embryonic camera-type eye morphogenesis” and FunDO:(1853) Eye cancer, including more than twenty other cancer types.</p>                                                                                                                                |
| <b>ANRIL</b> | <p>lncRNA ENSG00000240498 commonly known as ANRIL has been implicated in the progression of several cancer types such as prostate cancer (175), esophageal squamous cell carcinoma (176), Malignant glioma (177), bladder cancer (178) and breast cancer (179) . ANRIL inhibits p15 (INK4b) through the TGFβ1 signaling pathway in human ANRIL interaction with TGF-β pathway and increased expression of TGF-β and p-Smad2/3 (180).</p> <p>FARNA suggest “GO:0030219 megakaryocyte differentiation”, “FunDO:(1944) Breast</p>                                                                                                                                                                                                                                    |

cancer”, “FunDO:(2125) Bladder cancer”, “NHGRI GWAS Catalog:(KOBAS:7855) Esophageal cancer” and “FunDO:(2214) Malignant glioma”.

ANRIL is also shown to be involved in atherosclerosis (181) and FARNA suggest “GAD:(KOBAS:1134) Atherosclerosis, coronary” disease in “fibroblast pulmonary artery”.

**PTCSC3** It has been demonstrated that PTCSC3 is a tumor suppressor and a target of miRNAs in thyroid cancer cells (182) . The expression of PTCSC3 is down-regulated in thyroid cancer (182), whereas in FARNA PTCSC3 is shown to be highly expressed in normal “thyroid” and “throat” tissue and very specific to these tissues, as well as return disease annotation “KEGG DISEASE:(H00032) Thyroid cancer”

**Supplementary Table S2:** List of miRNAs and their annotations downloaded from AMIGO site.

| MIRNA           | GO term               | Reference     |
|-----------------|-----------------------|---------------|
| hsa-miR-133a-3p | GO:0010881            | PMID:22378787 |
| hsa-miR-19b-3p  | GO:0008284            | PMID:22378787 |
| hsa-miR-19b-3p  | GO:0010629            | PMID:25765596 |
| hsa-miR-19b-3p  | GO:0035195            | PMID:18728182 |
| hsa-miR-19b-3p  | GO:0035195            | PMID:24998411 |
| hsa-miR-19b-3p  | GO:0035195            | PMID:25084135 |
| hsa-miR-19b-3p  | GO:0035278            | PMID:21796614 |
| hsa-miR-19b-3p  | GO:0042517            | PMID:18728182 |
| hsa-miR-19b-3p  | GO:0048471            | PMID:18728182 |
| hsa-miR-19b-3p  | GO:0050819            | PMID:24998411 |
| hsa-miR-19b-3p  | GO:0060045            | PMID:24998411 |
| hsa-miR-19b-3p  | GO:0072562            | PMID:24998411 |
| hsa-miR-19b-3p  | GO:0090370            | PMID:25084135 |
| hsa-miR-19b-3p  | GO:0090370            | PMID:25765596 |
| hsa-miR-19b-3p  | GO:0097006            | PMID:25765596 |
| hsa-miR-19b-3p  | GO:1901295            | PMID:25765596 |
| hsa-miR-19b-3p  | GO:1903063            | PMID:25765596 |
| hsa-miR-19b-3p  | GO:1903231            | PMID:18728182 |
| hsa-miR-19b-3p  | GO:1903231            | PMID:21796614 |
| hsa-miR-19b-3p  | GO:1903231            | PMID:24998411 |
| hsa-miR-19b-3p  | GO:1903231            | PMID:25084135 |
| hsa-miR-19b-3p  | GO:1904747            | PMID:25084135 |
| hsa-miR-19b-3p  | GO:1905095            | PMID:25084135 |
| hsa-miR-19b-3p  | GO:0038027 CL:0000517 | PMID:25084135 |

|                 |            |               |
|-----------------|------------|---------------|
| hsa-miR-19b-3p  | GO:2000188 | PMID:25765596 |
| hsa-miR-218-5p  | GO:0032966 | PMID:19913496 |
| hsa-miR-218-5p  | GO:0035278 | PMID:19913496 |
| hsa-miR-218-5p  | GO:0035278 | PMID:19913496 |
| hsa-miR-218-5p  | GO:1903231 | PMID:19913496 |
| hsa-miR-218-5p  | GO:1903231 | PMID:19913496 |
| hsa-miR-378a-5p | GO:0000993 | PMID:25336585 |
| hsa-miR-19a-3p  | GO:0010667 | PMID:25336585 |
| hsa-miR-19a-3p  | GO:0035195 | PMID:18728182 |
| hsa-miR-19a-3p  | GO:0035195 | PMID:20940405 |
| hsa-miR-19a-3p  | GO:0035195 | PMID:20940405 |
| hsa-miR-19a-3p  | GO:0035195 | PMID:25785039 |
| hsa-miR-19a-3p  | GO:0042517 | PMID:18728182 |
| hsa-miR-19a-3p  | GO:0070062 | PMID:18728182 |
| hsa-miR-19a-3p  | GO:1903202 | PMID:18728182 |
| hsa-miR-19a-3p  | GO:1903231 | PMID:18728182 |
| hsa-miR-19a-3p  | GO:1903231 | PMID:25785039 |
| hsa-miR-19a-3p  | GO:1903671 | PMID:20299512 |
| hsa-miR-31-5p   | GO:0035195 | PMID:19949084 |
| hsa-miR-31-5p   | GO:0035278 | PMID:20826792 |
| hsa-miR-31-5p   | GO:1904995 | PMID:19949084 |
| hsa-miR-31-5p   | GO:0071356 | PMID:19949084 |
| hsa-miR-31-5p   | GO:1903231 | PMID:19949084 |
| hsa-miR-31-5p   | GO:1903231 | PMID:20826792 |
| hsa-miR-31-5p   | GO:0071356 | PMID:19949084 |
| hsa-miR-21-3p   | GO:0008285 | PMID:24098708 |
| hsa-miR-21-3p   | GO:0035195 | PMID:24098708 |
| hsa-miR-21-3p   | GO:0043065 | PMID:24098708 |
| hsa-miR-21-3p   | GO:1903231 | PMID:24098708 |
| hsa-miR-199b-5p | GO:0035195 | PMID:15131085 |
| hsa-miR-199b-5p | GO:1903231 | PMID:15131085 |
| hsa-miR-212-3p  | GO:0035278 | PMID:22880819 |
| hsa-miR-212-3p  | GO:1903231 | PMID:22880819 |
| hsa-miR-212-3p  | GO:1903609 | PMID:22880819 |
| hsa-miR-208a-3p | GO:0002154 | PMID:22880819 |
| hsa-miR-208a-3p | GO:0035195 | PMID:19726871 |
| hsa-miR-208a-3p | GO:0042632 | PMID:19726871 |
| hsa-miR-208a-3p | GO:0045822 | PMID:19726871 |
| hsa-miR-208a-3p | GO:0061051 | PMID:19726871 |
| hsa-miR-208a-3p | GO:0070328 | PMID:19726871 |

|                 |            |               |
|-----------------|------------|---------------|
| hsa-miR-208a-3p | GO:1903231 | PMID:19726871 |
| hsa-miR-208a-3p | GO:1903244 | PMID:19726871 |
| hsa-miR-208a-3p | GO:1903779 | PMID:19726871 |
| hsa-miR-208a-3p | GO:1905027 | PMID:19726871 |
| hsa-miR-141-3p  | GO:0008284 | PMID:16762633 |
| hsa-miR-141-3p  | GO:0035195 | PMID:15131085 |
| hsa-miR-141-3p  | GO:0035195 | PMID:16762633 |
| hsa-miR-141-3p  | GO:1903231 | PMID:15131085 |
| hsa-miR-181b-3p | GO:0035195 | PMID:18728182 |
| hsa-miR-181b-3p | GO:1903231 | PMID:18728182 |
| hsa-miR-93-5p   | GO:0035195 | PMID:18728182 |
| hsa-miR-93-5p   | GO:1903231 | PMID:18728182 |
| hsa-miR-30b-5p  | GO:0035195 | PMID:22387553 |
| hsa-miR-30b-5p  | GO:0042104 | PMID:22387553 |
| hsa-miR-30b-5p  | GO:1903231 | PMID:22387553 |
| hsa-miR-30b-5p  | GO:1903231 | PMID:22387553 |
| hsa-miR-107     | GO:0035195 | PMID:25033200 |
| hsa-miR-107     | GO:1903231 | PMID:25033200 |
| hsa-miR-15a-3p  | GO:0006919 | PMID:23353574 |
| hsa-miR-15a-3p  | GO:0035195 | PMID:23353574 |
| hsa-miR-15a-3p  | GO:1903231 | PMID:23353574 |
| hsa-miR-29a-3p  | GO:0010629 | PMID:20570858 |
| hsa-miR-29a-3p  | GO:0035195 | PMID:20570858 |
| hsa-miR-29a-3p  | GO:0035195 | PMID:21761362 |
| hsa-miR-29a-3p  | GO:0061754 | PMID:20570858 |
| hsa-miR-29a-3p  | GO:1903231 | PMID:21761362 |
| hsa-miR-451a    | GO:0005615 | PMID:20159880 |
| hsa-miR-584-5p  | GO:0000993 | PMID:25336585 |
| hsa-miR-21-5p   | GO:0032869 | PMID:25336585 |
| hsa-miR-21-5p   | GO:0001934 | PMID:25336585 |
| hsa-miR-21-5p   | GO:0001934 | PMID:16762633 |
| hsa-miR-21-5p   | GO:0001937 | PMID:21347332 |
| hsa-miR-21-5p   | GO:0001937 | PMID:23496142 |
| hsa-miR-21-5p   | GO:0003730 | PMID:21376256 |
| hsa-miR-21-5p   | GO:0005737 | PMID:23657402 |
| hsa-miR-21-5p   | GO:0007566 | PMID:18556655 |
| hsa-miR-21-5p   | GO:0008284 | PMID:16762633 |
| hsa-miR-21-5p   | GO:0008284 | PMID:18384814 |
| hsa-miR-21-5p   | GO:0008284 | PMID:21219636 |
| hsa-miR-21-5p   | GO:0008284 | PMID:21376256 |

|               |                                  |               |
|---------------|----------------------------------|---------------|
| hsa-miR-21-5p | GO:0033554                       | PMID:19826040 |
| hsa-miR-21-5p | GO:0008360                       | PMID:21817107 |
| hsa-miR-21-5p | GO:0010596                       | PMID:21347332 |
| hsa-miR-21-5p | GO:0010613                       | PMID:21347332 |
| hsa-miR-21-5p | GO:0010614                       | PMID:21347332 |
| hsa-miR-21-5p | GO:0010628                       | PMID:21376256 |
| hsa-miR-21-5p | GO:0010629                       | PMID:17072344 |
| hsa-miR-21-5p | GO:0010629                       | PMID:23684551 |
| hsa-miR-21-5p | GO:0010667                       | PMID:23684551 |
| hsa-miR-21-5p | GO:0071559                       | PMID:24887517 |
| hsa-miR-21-5p | GO:0010838                       | PMID:21328460 |
| hsa-miR-21-5p | GO:0001937 GO:0010596 GO:0061154 | PMID:21347332 |
| hsa-miR-21-5p | GO:0030334                       | PMID:20460403 |
| hsa-miR-21-5p | GO:1904685                       | PMID:18591254 |
| hsa-miR-21-5p | GO:0030335                       | PMID:20460403 |
| hsa-miR-21-5p | GO:0030335                       | PMID:21219636 |
| hsa-miR-21-5p | GO:0030335                       | PMID:23442323 |
| hsa-miR-21-5p | GO:0086024 CL:0002494 GO:0003300 | PMID:23442323 |
| hsa-miR-21-5p | GO:0032148                       | PMID:22879939 |
| hsa-miR-21-5p | GO:0032480                       | PMID:23633945 |
| hsa-miR-21-5p | GO:0032963                       | PMID:23633945 |
| hsa-miR-21-5p | GO:0034260                       | PMID:21347332 |
| hsa-miR-21-5p | GO:0034260                       | PMID:22158624 |
| hsa-miR-21-5p | GO:0034392                       | PMID:22158624 |
| hsa-miR-21-5p | GO:0034392                       | PMID:22158624 |
| hsa-miR-21-5p | GO:0035195                       | PMID:16762633 |
| hsa-miR-21-5p | GO:0035195                       | PMID:17968323 |
| hsa-miR-21-5p | GO:0035195                       | PMID:18270520 |
| hsa-miR-21-5p | GO:0035195                       | PMID:18556655 |
| hsa-miR-21-5p | GO:0035195                       | PMID:18591254 |
| hsa-miR-21-5p | GO:0035195                       | PMID:18829576 |
| hsa-miR-21-5p | GO:0035195                       | PMID:19013014 |
| hsa-miR-21-5p | GO:0035195                       | PMID:19136465 |
| hsa-miR-21-5p | GO:0035195                       | PMID:19253296 |
| hsa-miR-21-5p | GO:0035195                       | PMID:19302977 |
| hsa-miR-21-5p | GO:0035195                       | PMID:19546886 |
| hsa-miR-21-5p | GO:0035195                       | PMID:19559015 |
| hsa-miR-21-5p | GO:0035195                       | PMID:19816956 |
| hsa-miR-21-5p | GO:0035195                       | PMID:19826040 |

|               |            |               |
|---------------|------------|---------------|
| hsa-miR-21-5p | GO:0035195 | PMID:20371612 |
| hsa-miR-21-5p | GO:0035195 | PMID:20460403 |
| hsa-miR-21-5p | GO:0035195 | PMID:20483747 |
| hsa-miR-21-5p | GO:0035195 | PMID:20533548 |
| hsa-miR-21-5p | GO:0035195 | PMID:20693317 |
| hsa-miR-21-5p | GO:0035195 | PMID:21131358 |
| hsa-miR-21-5p | GO:0035195 | PMID:21170291 |
| hsa-miR-21-5p | GO:0035195 | PMID:21219636 |
| hsa-miR-21-5p | GO:0035195 | PMID:21317927 |
| hsa-miR-21-5p | GO:0035195 | PMID:21347332 |
| hsa-miR-21-5p | GO:0035195 | PMID:21820586 |
| hsa-miR-21-5p | GO:0035195 | PMID:22001440 |
| hsa-miR-21-5p | GO:0035195 | PMID:22158624 |
| hsa-miR-21-5p | GO:0035195 | PMID:22286305 |
| hsa-miR-21-5p | GO:0035195 | PMID:22316494 |
| hsa-miR-21-5p | GO:0035195 | PMID:22387553 |
| hsa-miR-21-5p | GO:0035195 | PMID:22573493 |
| hsa-miR-21-5p | GO:0035195 | PMID:22618231 |
| hsa-miR-21-5p | GO:0035195 | PMID:22836756 |
| hsa-miR-21-5p | GO:0035195 | PMID:22879939 |
| hsa-miR-21-5p | GO:0035195 | PMID:23239100 |
| hsa-miR-21-5p | GO:0035195 | PMID:23441172 |
| hsa-miR-21-5p | GO:0035195 | PMID:23442323 |
| hsa-miR-21-5p | GO:0035195 | PMID:23496142 |
| hsa-miR-21-5p | GO:0035195 | PMID:23633945 |
| hsa-miR-21-5p | GO:0035195 | PMID:23657402 |
| hsa-miR-21-5p | GO:0035195 | PMID:24012640 |
| hsa-miR-21-5p | GO:0035195 | PMID:24112539 |
| hsa-miR-21-5p | GO:0035195 | PMID:24155920 |
| hsa-miR-21-5p | GO:0035195 | PMID:24237305 |
| hsa-miR-21-5p | GO:0035195 | PMID:24327270 |
| hsa-miR-21-5p | GO:0035195 | PMID:24577233 |
| hsa-miR-21-5p | GO:0035195 | PMID:24699315 |
| hsa-miR-21-5p | GO:0035195 | PMID:24887517 |
| hsa-miR-21-5p | GO:0035195 | PMID:25107449 |
| hsa-miR-21-5p | GO:0035195 | PMID:25118289 |
| hsa-miR-21-5p | GO:0035278 | PMID:17363372 |

|               |                                             |               |
|---------------|---------------------------------------------|---------------|
| hsa-miR-21-5p | GO:0035278                                  | PMID:18372920 |
| hsa-miR-21-5p | GO:0035278                                  | PMID:18384814 |
| hsa-miR-21-5p | GO:0035278                                  | PMID:19013014 |
| hsa-miR-21-5p | GO:0035278                                  | PMID:20826792 |
| hsa-miR-21-5p | GO:0035278                                  | PMID:21078976 |
| hsa-miR-21-5p | GO:0035278                                  | PMID:21328460 |
| hsa-miR-21-5p | GO:0035278                                  | PMID:21636785 |
| hsa-miR-21-5p | GO:0035278                                  | PMID:21817107 |
| hsa-miR-21-5p | GO:0035278                                  | PMID:22034194 |
| hsa-miR-21-5p | GO:0036166                                  | PMID:23441172 |
| hsa-miR-21-5p | GO:0042058                                  | PMID:24012640 |
| hsa-miR-21-5p | GO:0042104                                  | PMID:22387553 |
| hsa-miR-21-5p | GO:0043066                                  | PMID:16762633 |
| hsa-miR-21-5p | GO:0043066                                  | PMID:20371612 |
| hsa-miR-21-5p | GO:0043066                                  | PMID:21376256 |
| hsa-miR-21-5p | GO:0045600                                  | PMID:19816956 |
| hsa-miR-21-5p | GO:0035924                                  | PMID:24356956 |
| hsa-miR-21-5p | GO:0035924                                  | PMID:24356956 |
| hsa-miR-21-5p | GO:0009617 GO:0038123                       | PMID:22286305 |
| hsa-miR-21-5p | GO:0034616 CL:0000071                       | PMID:21636785 |
| hsa-miR-21-5p | GO:0051497                                  | PMID:21347332 |
| hsa-miR-21-5p | GO:0051896                                  | PMID:21347332 |
| hsa-miR-21-5p | GO:0051897                                  | PMID:16762633 |
| hsa-miR-21-5p | GO:0051897                                  | PMID:22879939 |
| hsa-miR-21-5p | GO:0071456                                  | PMID:24983504 |
| hsa-miR-21-5p | GO:0060940                                  | PMID:23441172 |
| hsa-miR-21-5p | GO:0061037                                  | PMID:24577233 |
| hsa-miR-21-5p | GO:0061154                                  | PMID:21347332 |
| hsa-miR-21-5p | GO:0070373                                  | PMID:20483747 |
| hsa-miR-21-5p | GO:0070374                                  | PMID:20483747 |
| hsa-miR-21-5p | GO:0070374                                  | PMID:20483747 |
| hsa-miR-21-5p | GO:0070374                                  | PMID:20483747 |
| hsa-miR-21-5p | GO:0045444 CL:0000134 GO:0001649 CL:0000134 | PMID:23239100 |
| hsa-miR-21-5p | GO:0071479                                  | PMID:22836756 |
| hsa-miR-21-5p | GO:1902254                                  | PMID:18829576 |
| hsa-miR-21-5p | GO:1902304                                  | PMID:21170291 |
| hsa-miR-21-5p | GO:0071480                                  | PMID:19826040 |
| hsa-miR-21-5p | GO:1902514                                  | PMID:25107449 |
| hsa-miR-21-5p | GO:1902731                                  | PMID:24577233 |

|               |            |               |
|---------------|------------|---------------|
| hsa-miR-21-5p | GO:1903231 | PMID:16762633 |
| hsa-miR-21-5p | GO:1903231 | PMID:17363372 |
| hsa-miR-21-5p | GO:1903231 | PMID:17968323 |
| hsa-miR-21-5p | GO:1903231 | PMID:18270520 |
| hsa-miR-21-5p | GO:1903231 | PMID:18372920 |
| hsa-miR-21-5p | GO:1903231 | PMID:18384814 |
| hsa-miR-21-5p | GO:1903231 | PMID:18591254 |
| hsa-miR-21-5p | GO:1903231 | PMID:18829576 |
| hsa-miR-21-5p | GO:1903231 | PMID:19013014 |
| hsa-miR-21-5p | GO:1903231 | PMID:19253296 |
| hsa-miR-21-5p | GO:1903231 | PMID:19302977 |
| hsa-miR-21-5p | GO:1903231 | PMID:19546886 |
| hsa-miR-21-5p | GO:1903231 | PMID:19559015 |
| hsa-miR-21-5p | GO:1903231 | PMID:19816956 |
| hsa-miR-21-5p | GO:1903231 | PMID:19826040 |
| hsa-miR-21-5p | GO:1903231 | PMID:20371612 |
| hsa-miR-21-5p | GO:1903231 | PMID:20460403 |
| hsa-miR-21-5p | GO:1903231 | PMID:20483747 |
| hsa-miR-21-5p | GO:1903231 | PMID:20533548 |
| hsa-miR-21-5p | GO:1903231 | PMID:20693317 |
| hsa-miR-21-5p | GO:1903231 | PMID:20826792 |
| hsa-miR-21-5p | GO:1903231 | PMID:21078976 |
| hsa-miR-21-5p | GO:1903231 | PMID:21131358 |
| hsa-miR-21-5p | GO:1903231 | PMID:21170291 |
| hsa-miR-21-5p | GO:1903231 | PMID:21219636 |
| hsa-miR-21-5p | GO:1903231 | PMID:21317927 |
| hsa-miR-21-5p | GO:1903231 | PMID:21328460 |
| hsa-miR-21-5p | GO:1903231 | PMID:21347332 |
| hsa-miR-21-5p | GO:1903231 | PMID:21636785 |
| hsa-miR-21-5p | GO:1903231 | PMID:21817107 |
| hsa-miR-21-5p | GO:1903231 | PMID:21820586 |
| hsa-miR-21-5p | GO:1903231 | PMID:22001440 |
| hsa-miR-21-5p | GO:1903231 | PMID:22034194 |
| hsa-miR-21-5p | GO:1903231 | PMID:22158624 |
| hsa-miR-21-5p | GO:1903231 | PMID:22158624 |
| hsa-miR-21-5p | GO:1903231 | PMID:22286305 |
| hsa-miR-21-5p | GO:1903231 | PMID:22316494 |
| hsa-miR-21-5p | GO:1903231 | PMID:22387553 |
| hsa-miR-21-5p | GO:1903231 | PMID:22573493 |
| hsa-miR-21-5p | GO:1903231 | PMID:22618231 |



|                |                                                                                                                   |               |
|----------------|-------------------------------------------------------------------------------------------------------------------|---------------|
| hsa-miR-21-5p  | GO:1903231                                                                                                        | PMID:22836756 |
| hsa-miR-21-5p  | GO:1903231                                                                                                        | PMID:23239100 |
| hsa-miR-21-5p  | GO:1903231                                                                                                        | PMID:23442323 |
| hsa-miR-21-5p  | GO:1903231                                                                                                        | PMID:23496142 |
| hsa-miR-21-5p  | GO:1903231                                                                                                        | PMID:23633945 |
| hsa-miR-21-5p  | GO:1903231                                                                                                        | PMID:23657402 |
| hsa-miR-21-5p  | GO:1903231                                                                                                        | PMID:24012640 |
| hsa-miR-21-5p  | GO:1903231                                                                                                        | PMID:24112539 |
| hsa-miR-21-5p  | GO:1903231                                                                                                        | PMID:24155920 |
| hsa-miR-21-5p  | GO:1903231                                                                                                        | PMID:24237305 |
| hsa-miR-21-5p  | GO:1903231                                                                                                        | PMID:24327270 |
| hsa-miR-21-5p  | GO:1903231                                                                                                        | PMID:24577233 |
| hsa-miR-21-5p  | GO:1903231                                                                                                        | PMID:24699315 |
| hsa-miR-21-5p  | GO:1903231                                                                                                        | PMID:25107449 |
| hsa-miR-21-5p  | GO:1903231                                                                                                        | PMID:25118289 |
| hsa-miR-21-5p  | GO:1904685                                                                                                        | PMID:18591254 |
| hsa-miR-21-5p  | GO:1904695                                                                                                        | PMID:22158624 |
| hsa-miR-21-5p  | GO:1904707                                                                                                        | PMID:22158624 |
| hsa-miR-21-5p  | GO:0071456 UBERON:0002012                                                                                         | PMID:20693317 |
| hsa-miR-21-5p  | GO:1904707                                                                                                        | PMID:21817107 |
| hsa-miR-21-5p  | GO:1904707                                                                                                        | PMID:22034194 |
| hsa-miR-21-5p  | GO:1904728                                                                                                        | PMID:23496142 |
| hsa-miR-21-5p  | GO:1904753                                                                                                        | PMID:22158624 |
| hsa-miR-21-5p  | GO:1904754                                                                                                        | PMID:20693317 |
| hsa-miR-21-5p  | GO:1904754                                                                                                        | PMID:20693317 |
| hsa-miR-21-5p  | GO:1904754                                                                                                        | PMID:21817107 |
| hsa-miR-21-5p  | GO:1904762                                                                                                        | PMID:20533548 |
| hsa-miR-21-5p  | GO:1904827                                                                                                        | PMID:22034194 |
| hsa-miR-21-5p  | GO:1904830                                                                                                        | PMID:22034194 |
| hsa-miR-21-5p  | GO:0034616                                                                                                        | PMID:21636785 |
| hsa-miR-21-5p  | GO:0033554                                                                                                        | PMID:19826040 |
| hsa-miR-21-5p  | GO:0034599 CL:0002495                                                                                             | PMID:19826040 |
| hsa-miR-20a-5p | GO:0000993                                                                                                        | PMID:25336585 |
| hsa-miR-20a-5p | GO:0003151                                                                                                        | PMID:25336585 |
| hsa-miR-20a-5p | GO:0071456 CL:0002591 ENSEMBL:ENSG00000125968 GO:0030514 GO:0071456 CL:0002591 ENSEMBL:ENSG00000115738 GO:0030514 | PMID:22450430 |
| hsa-miR-20a-5p | GO:0010629                                                                                                        | PMID:22450430 |
| hsa-miR-20a-5p | GO:0071456 UBERON:0007221                                                                                         | PMID:22450430 |
| hsa-miR-20a-5p | GO:0071456 UBERON:0003495                                                                                         | PMID:22450430 |

|                 |                           |               |
|-----------------|---------------------------|---------------|
| hsa-miR-20a-5p  | GO:0035195                | PMID:21145484 |
| hsa-miR-20a-5p  | GO:0035195                | PMID:22450430 |
| hsa-miR-20a-5p  | GO:0035195                | PMID:23308108 |
| hsa-miR-20a-5p  | GO:0035195                | PMID:23969726 |
| hsa-miR-20a-5p  | GO:0035278                | PMID:19390056 |
| hsa-miR-20a-5p  | GO:1903231                | PMID:19390056 |
| hsa-miR-20a-5p  | GO:1903231                | PMID:21145484 |
| hsa-miR-20a-5p  | GO:1903231                | PMID:23308108 |
| hsa-miR-20a-5p  | GO:1903231                | PMID:23969726 |
| hsa-miR-20a-5p  | GO:0071456 UBERON:0002080 | PMID:23969726 |
| hsa-miR-20a-5p  | GO:1903671                | PMID:20299512 |
| hsa-miR-20a-5p  | GO:1904707                | PMID:22450430 |
| hsa-miR-20a-5p  | GO:0071456 UBERON:0001980 | PMID:22450430 |
| hsa-miR-20a-5p  | GO:0010611                | PMID:22450430 |
| hsa-miR-133a-3p | GO:0005615                | PMID:20159880 |
| hsa-miR-133a-3p | GO:0030818 CL:0000746     | PMID:20159880 |
| hsa-miR-133a-3p | GO:0010614                | PMID:20159880 |
| hsa-miR-133a-3p | GO:0010667                | PMID:20159880 |
| hsa-miR-133a-3p | GO:0010667                | PMID:20159880 |
| hsa-miR-133a-3p | GO:0010831                | PMID:20159880 |
| hsa-miR-133a-3p | GO:0010881                | PMID:20159880 |
| hsa-miR-133a-3p | GO:0035195                | PMID:22163007 |
| hsa-miR-133a-3p | GO:0035195                | PMID:23157812 |
| hsa-miR-133a-3p | GO:0035195                | PMID:24920580 |
| hsa-miR-133a-3p | GO:0060307                | PMID:24920580 |
| hsa-miR-133a-3p | GO:0014902                | PMID:24920580 |
| hsa-miR-133a-3p | GO:0071877                | PMID:24920580 |
| hsa-miR-133a-3p | GO:1902260                | PMID:23157812 |
| hsa-miR-133a-3p | GO:1903206                | PMID:23157812 |
| hsa-miR-133a-3p | GO:1903231                | PMID:22163007 |
| hsa-miR-133a-3p | GO:1903231                | PMID:24920580 |
| hsa-miR-133a-3p | GO:1905024                | PMID:24920580 |
| hsa-miR-133a-3p | GO:1905032                | PMID:23157812 |
| hsa-miR-133a-3p | GO:2000134                | PMID:23157812 |
| hsa-miR-133a-3p | GO:2000480                | PMID:23157812 |
| hsa-miR-133a-3p | GO:2000818                | PMID:23157812 |
| hsa-miR-206     | GO:0035195                | PMID:20388878 |
| hsa-miR-206     | GO:1903231                | PMID:20388878 |
| hsa-miR-499a-5p | GO:0035195                | PMID:23499625 |
| hsa-miR-499a-5p | GO:1903231                | PMID:23499625 |

|                |                           |               |
|----------------|---------------------------|---------------|
| hsa-miR-126-5p | GO:0000993                | PMID:25336585 |
| hsa-miR-205-5p | GO:1903847                | PMID:19136465 |
| hsa-miR-205-5p | GO:1904685                | PMID:19136465 |
| hsa-miR-221-3p | GO:0010634                | PMID:21673316 |
| hsa-miR-221-3p | GO:0010718                | PMID:21673316 |
| hsa-miR-221-3p | GO:0034115                | PMID:20110463 |
| hsa-miR-221-3p | GO:0035195                | PMID:16330772 |
| hsa-miR-221-3p | GO:0035195                | PMID:18246122 |
| hsa-miR-221-3p | GO:0035195                | PMID:18413744 |
| hsa-miR-221-3p | GO:0035195                | PMID:19088079 |
| hsa-miR-221-3p | GO:0035195                | PMID:19153141 |
| hsa-miR-221-3p | GO:0035195                | PMID:19962668 |
| hsa-miR-221-3p | GO:0035195                | PMID:20299489 |
| hsa-miR-221-3p | GO:0035195                | PMID:20388878 |
| hsa-miR-221-3p | GO:0035195                | PMID:20813046 |
| hsa-miR-221-3p | GO:0035195                | PMID:21071579 |
| hsa-miR-221-3p | GO:0035195                | PMID:21310411 |
| hsa-miR-221-3p | GO:0035195                | PMID:21673316 |
| hsa-miR-221-3p | GO:0035195                | PMID:22294051 |
| hsa-miR-221-3p | GO:0035195                | PMID:24147153 |
| hsa-miR-221-3p | GO:0035195                | PMID:24269686 |
| hsa-miR-221-3p | GO:0035195                | PMID:24736554 |
| hsa-miR-221-3p | GO:0035278                | PMID:18790736 |
| hsa-miR-221-3p | GO:0035278                | PMID:19088079 |
| hsa-miR-221-3p | GO:0035278                | PMID:19671867 |
| hsa-miR-221-3p | GO:0035278                | PMID:19962668 |
| hsa-miR-221-3p | GO:0035278                | PMID:20110463 |
| hsa-miR-221-3p | GO:0043065                | PMID:24147153 |
| hsa-miR-221-3p | GO:0043066                | PMID:19671867 |
| hsa-miR-221-3p | GO:0043066                | PMID:20813046 |
| hsa-miR-221-3p | GO:0044828                | PMID:20813046 |
| hsa-miR-221-3p | GO:0045648                | PMID:16330772 |
| hsa-miR-221-3p | GO:0048008                | PMID:19088079 |
| hsa-miR-221-3p | GO:0048680                | PMID:19088079 |
| hsa-miR-221-3p | GO:0050728                | PMID:21310411 |
| hsa-miR-221-3p | GO:0051897                | PMID:19962668 |
| hsa-miR-221-3p | GO:0060354                | PMID:21310411 |
| hsa-miR-221-3p | GO:0070374                | PMID:19962668 |
| hsa-miR-221-3p | GO:0051607 UBERON:0000948 | PMID:19962668 |
| hsa-miR-221-3p | GO:0071363                | PMID:18413744 |

|                |                       |               |
|----------------|-----------------------|---------------|
| hsa-miR-221-3p | GO:0031103            | PMID:18413744 |
| hsa-miR-221-3p | GO:1902034            | PMID:16330772 |
| hsa-miR-221-3p | GO:1903122            | PMID:18246122 |
| hsa-miR-221-3p | GO:1903122            | PMID:19962668 |
| hsa-miR-221-3p | GO:1903231            | PMID:16330772 |
| hsa-miR-221-3p | GO:1903231            | PMID:18413744 |
| hsa-miR-221-3p | GO:1903231            | PMID:18790736 |
| hsa-miR-221-3p | GO:1903231            | PMID:19153141 |
| hsa-miR-221-3p | GO:1903231            | PMID:19671867 |
| hsa-miR-221-3p | GO:1903231            | PMID:19962668 |
| hsa-miR-221-3p | GO:1903231            | PMID:20110463 |
| hsa-miR-221-3p | GO:1903231            | PMID:20299489 |
| hsa-miR-221-3p | GO:1903231            | PMID:20388878 |
| hsa-miR-221-3p | GO:1903231            | PMID:20813046 |
| hsa-miR-221-3p | GO:1903231            | PMID:21071579 |
| hsa-miR-221-3p | GO:1903231            | PMID:21310411 |
| hsa-miR-221-3p | GO:1903231            | PMID:21673316 |
| hsa-miR-221-3p | GO:1903231            | PMID:22294051 |
| hsa-miR-221-3p | GO:1903231            | PMID:24147153 |
| hsa-miR-221-3p | GO:1903231            | PMID:24269686 |
| hsa-miR-221-3p | GO:1903231            | PMID:24736554 |
| hsa-miR-221-3p | GO:1903691            | PMID:24269686 |
| hsa-miR-221-3p | GO:1904707            | PMID:24269686 |
| hsa-miR-221-3p | GO:1904707            | PMID:19088079 |
| hsa-miR-221-3p | GO:1904754            | PMID:19088079 |
| hsa-miR-221-3p | GO:1904995            | PMID:21310411 |
| hsa-miR-221-3p | GO:1905046            | PMID:21310411 |
| hsa-miR-221-3p | GO:1905064            | PMID:19088079 |
| hsa-miR-221-3p | GO:0048008 CL:0002591 | PMID:19088079 |
| hsa-miR-221-3p | GO:2000780            | PMID:24147153 |
| hsa-miR-26a-5p | GO:0010459            | PMID:24147153 |
| hsa-miR-26a-5p | GO:0035195            | PMID:20660482 |
| hsa-miR-26a-5p | GO:0035195            | PMID:20660482 |
| hsa-miR-26a-5p | GO:0035195            | PMID:20660482 |
| hsa-miR-26a-5p | GO:0035195            | PMID:23543060 |
| hsa-miR-26a-5p | GO:0060371            | PMID:23543060 |
| hsa-miR-26a-5p | GO:1903231            | PMID:20660482 |
| hsa-miR-26a-5p | GO:1903231            | PMID:20660482 |
| hsa-miR-26a-5p | GO:1903231            | PMID:20660482 |
| hsa-miR-26a-5p | GO:1903231            | PMID:23543060 |

|                |            |               |
|----------------|------------|---------------|
| hsa-miR-26a-5p | GO:1903609 | PMID:23543060 |
| hsa-miR-26a-5p | GO:1903609 | PMID:23543060 |
| hsa-miR-18a-5p | GO:0035195 | PMID:20940405 |
| hsa-miR-18a-5p | GO:0035195 | PMID:21145484 |
| hsa-miR-18a-5p | GO:0035195 | PMID:21145484 |
| hsa-miR-18a-5p | GO:0048471 | PMID:21145484 |
| hsa-miR-18a-5p | GO:1903231 | PMID:20940405 |
| hsa-miR-18a-5p | GO:1903231 | PMID:21145484 |
| hsa-miR-18a-5p | GO:1903231 | PMID:21145484 |
| hsa-miR-18a-5p | GO:1903671 | PMID:20299512 |
| hsa-miR-23b-3p | GO:0061049 | PMID:20299512 |
| hsa-miR-222-3p | GO:0010634 | PMID:21673316 |
| hsa-miR-222-3p | GO:0010718 | PMID:21673316 |
| hsa-miR-222-3p | GO:0016525 | PMID:20489169 |
| hsa-miR-222-3p | GO:0035195 | PMID:16330772 |
| hsa-miR-222-3p | GO:0035195 | PMID:18246122 |
| hsa-miR-222-3p | GO:0035195 | PMID:18413744 |
| hsa-miR-222-3p | GO:0035195 | PMID:19153141 |
| hsa-miR-222-3p | GO:0035195 | PMID:19487542 |
| hsa-miR-222-3p | GO:0035195 | PMID:19962668 |
| hsa-miR-222-3p | GO:0035195 | PMID:20103675 |
| hsa-miR-222-3p | GO:0035195 | PMID:20299489 |
| hsa-miR-222-3p | GO:0035195 | PMID:20388878 |
| hsa-miR-222-3p | GO:0035195 | PMID:20489169 |
| hsa-miR-222-3p | GO:0035195 | PMID:20813046 |
| hsa-miR-222-3p | GO:0035195 | PMID:21310411 |
| hsa-miR-222-3p | GO:0035195 | PMID:21673316 |
| hsa-miR-222-3p | GO:0035195 | PMID:21711453 |
| hsa-miR-222-3p | GO:0035195 | PMID:21761362 |
| hsa-miR-222-3p | GO:0035195 | PMID:22294051 |
| hsa-miR-222-3p | GO:0035195 | PMID:22321642 |
| hsa-miR-222-3p | GO:0035195 | PMID:23587485 |
| hsa-miR-222-3p | GO:0035195 | PMID:23969726 |
| hsa-miR-222-3p | GO:0035195 | PMID:24147153 |
| hsa-miR-222-3p | GO:0035195 | PMID:24736554 |
| hsa-miR-222-3p | GO:0035195 | PMID:26045994 |
| hsa-miR-222-3p | GO:0035278 | PMID:18790736 |
| hsa-miR-222-3p | GO:0035278 | PMID:19962668 |
| hsa-miR-222-3p | GO:0043066 | PMID:20813046 |
| hsa-miR-222-3p | GO:0044828 | PMID:20813046 |

|                |                           |               |
|----------------|---------------------------|---------------|
| hsa-miR-222-3p | GO:0045648                | PMID:16330772 |
| hsa-miR-222-3p | GO:0048680                | PMID:16330772 |
| hsa-miR-222-3p | GO:0050728                | PMID:21310411 |
| hsa-miR-222-3p | GO:0051897                | PMID:19962668 |
| hsa-miR-222-3p | GO:0060045                | PMID:19962668 |
| hsa-miR-222-3p | GO:0060354                | PMID:21310411 |
| hsa-miR-222-3p | GO:0070374                | PMID:19962668 |
| hsa-miR-222-3p | GO:0090263                | PMID:23587485 |
| hsa-miR-222-3p | GO:0051607 UBERON:0000948 | PMID:23587485 |
| hsa-miR-222-3p | GO:0071363                | PMID:18413744 |
| hsa-miR-222-3p | GO:0031103                | PMID:18413744 |
| hsa-miR-222-3p | GO:1902034                | PMID:16330772 |
| hsa-miR-222-3p | GO:1903122                | PMID:18246122 |
| hsa-miR-222-3p | GO:1903122                | PMID:19962668 |
| hsa-miR-222-3p | GO:1903231                | PMID:16330772 |
| hsa-miR-222-3p | GO:1903231                | PMID:18413744 |
| hsa-miR-222-3p | GO:1903231                | PMID:18790736 |
| hsa-miR-222-3p | GO:1903231                | PMID:19153141 |
| hsa-miR-222-3p | GO:1903231                | PMID:19487542 |
| hsa-miR-222-3p | GO:1903231                | PMID:19962668 |
| hsa-miR-222-3p | GO:1903231                | PMID:20103675 |
| hsa-miR-222-3p | GO:1903231                | PMID:20299489 |
| hsa-miR-222-3p | GO:1903231                | PMID:20388878 |
| hsa-miR-222-3p | GO:1903231                | PMID:20489169 |
| hsa-miR-222-3p | GO:1903231                | PMID:20813046 |
| hsa-miR-222-3p | GO:1903231                | PMID:21310411 |
| hsa-miR-222-3p | GO:1903231                | PMID:21673316 |
| hsa-miR-222-3p | GO:1903231                | PMID:21711453 |
| hsa-miR-222-3p | GO:1903231                | PMID:21761362 |
| hsa-miR-222-3p | GO:1903231                | PMID:22294051 |
| hsa-miR-222-3p | GO:1903231                | PMID:22321642 |
| hsa-miR-222-3p | GO:1903231                | PMID:23587485 |
| hsa-miR-222-3p | GO:1903231                | PMID:23969726 |
| hsa-miR-222-3p | GO:1903231                | PMID:24147153 |
| hsa-miR-222-3p | GO:1903231                | PMID:24736554 |
| hsa-miR-222-3p | GO:1903231                | PMID:26045994 |
| hsa-miR-222-3p | GO:0044344 GO:0071345     | PMID:20489169 |
| hsa-miR-222-3p | GO:1904707                | PMID:20489169 |
| hsa-miR-222-3p | GO:1904995                | PMID:21310411 |
| hsa-miR-222-3p | GO:1905046                | PMID:21310411 |

|                        |            |               |
|------------------------|------------|---------------|
| <b>hsa-miR-222-3p</b>  | GO:2000726 | PMID:21310411 |
| <b>hsa-miR-139-5p</b>  | GO:0000993 | PMID:25336585 |
| <b>hsa-miR-181d-5p</b> | GO:0005737 | PMID:25336585 |
| <b>hsa-miR-181d-5p</b> | GO:0045944 | PMID:25336585 |
| <b>hsa-miR-200c-5p</b> | GO:0035195 | PMID:23938772 |
| <b>hsa-miR-200c-5p</b> | GO:1903231 | PMID:23938772 |
| <b>hsa-miR-590-3p</b>  | GO:0035195 | PMID:25149060 |
| <b>hsa-miR-590-3p</b>  | GO:0035195 | PMID:25465621 |
| <b>hsa-miR-590-3p</b>  | GO:0035195 | PMID:26278103 |
| <b>hsa-miR-590-3p</b>  | GO:0035278 | PMID:24952353 |
| <b>hsa-miR-590-3p</b>  | GO:0042632 | PMID:25149060 |
| <b>hsa-miR-590-3p</b>  | GO:0090198 | PMID:25149060 |
| <b>hsa-miR-590-3p</b>  | GO:0051005 | PMID:25149060 |
| <b>hsa-miR-590-3p</b>  | GO:0090198 | PMID:25149060 |
| <b>hsa-miR-590-3p</b>  | GO:1903231 | PMID:24952353 |
| <b>hsa-miR-590-3p</b>  | GO:1903231 | PMID:25149060 |
| <b>hsa-miR-590-3p</b>  | GO:1903231 | PMID:25465621 |
| <b>hsa-miR-590-3p</b>  | GO:1903231 | PMID:26278103 |
| <b>hsa-miR-590-3p</b>  | GO:2000773 | PMID:25465621 |
| <b>hsa-miR-424-5p</b>  | GO:0001937 | PMID:21885851 |
| <b>hsa-miR-424-5p</b>  | GO:0035195 | PMID:21885851 |
| <b>hsa-miR-424-5p</b>  | GO:0040037 | PMID:21885851 |
| <b>hsa-miR-424-5p</b>  | GO:1900747 | PMID:21885851 |
| <b>hsa-miR-424-5p</b>  | GO:1903231 | PMID:21885851 |
| <b>hsa-miR-424-5p</b>  | GO:1903588 | PMID:21885851 |
| <b>hsa-miR-424-5p</b>  | GO:2000545 | PMID:21885851 |
| <b>hsa-miR-409-3p</b>  | GO:0035195 | PMID:20570858 |
| <b>hsa-miR-409-3p</b>  | GO:0061754 | PMID:20570858 |
| <b>hsa-miR-409-3p</b>  | GO:1903231 | PMID:20570858 |
| <b>hsa-miR-148a-3p</b> | GO:0035195 | PMID:20483747 |
| <b>hsa-miR-148a-3p</b> | GO:1903231 | PMID:20483747 |
| <b>hsa-miR-200b-3p</b> | GO:0008284 | PMID:16762633 |
| <b>hsa-miR-200b-3p</b> | GO:0035195 | PMID:16762633 |
| <b>hsa-miR-200b-3p</b> | GO:0043066 | PMID:16762633 |
| <b>hsa-miR-133b</b>    | GO:0010831 | PMID:16762633 |
| <b>hsa-miR-133b</b>    | GO:0035195 | PMID:21351259 |
| <b>hsa-miR-133b</b>    | GO:0035278 | PMID:23296701 |
| <b>hsa-miR-133b</b>    | GO:0014902 | PMID:23296701 |
| <b>hsa-miR-133b</b>    | GO:1903231 | PMID:21351259 |
| <b>hsa-miR-133b</b>    | GO:1903231 | PMID:23296701 |

|                 |            |               |
|-----------------|------------|---------------|
| hsa-miR-133b    | GO:2000134 | PMID:23296701 |
| hsa-miR-133b    | GO:2000818 | PMID:23296701 |
| hsa-miR-181a-5p | GO:0010629 | PMID:18728182 |
| hsa-miR-181a-5p | GO:0010629 | PMID:18728182 |
| hsa-miR-181a-5p | GO:0035195 | PMID:18728182 |
| hsa-miR-181a-5p | GO:1903231 | PMID:18728182 |
| hsa-miR-16-5p   | GO:0000993 | PMID:25336585 |
| hsa-miR-16-5p   | GO:0001937 | PMID:21885851 |
| hsa-miR-16-5p   | GO:0005615 | PMID:20159880 |
| hsa-miR-16-5p   | GO:0008285 | PMID:22139073 |
| hsa-miR-16-5p   | GO:0016525 | PMID:21885851 |
| hsa-miR-16-5p   | GO:0016525 | PMID:23233752 |
| hsa-miR-16-5p   | GO:0035195 | PMID:15131085 |
| hsa-miR-16-5p   | GO:0035195 | PMID:16166262 |
| hsa-miR-16-5p   | GO:0035195 | PMID:18449891 |
| hsa-miR-16-5p   | GO:0035195 | PMID:19823025 |
| hsa-miR-16-5p   | GO:0035195 | PMID:21532615 |
| hsa-miR-16-5p   | GO:0035195 | PMID:21885851 |
| hsa-miR-16-5p   | GO:0035195 | PMID:22139073 |
| hsa-miR-16-5p   | GO:0035195 | PMID:25033200 |
| hsa-miR-16-5p   | GO:0035195 | PMID:25261849 |
| hsa-miR-16-5p   | GO:0035195 | PMID:25594541 |
| hsa-miR-16-5p   | GO:0035195 | PMID:25743273 |
| hsa-miR-16-5p   | GO:0035278 | PMID:23233752 |
| hsa-miR-16-5p   | GO:0035278 | PMID:25403480 |
| hsa-miR-16-5p   | GO:0040037 | PMID:21885851 |
| hsa-miR-16-5p   | GO:0043065 | PMID:25261849 |
| hsa-miR-16-5p   | GO:0045727 | PMID:25403480 |
| hsa-miR-16-5p   | GO:0045930 | PMID:25403480 |
| hsa-miR-16-5p   | GO:0070062 | PMID:23233752 |
| hsa-miR-16-5p   | GO:1900747 | PMID:21885851 |
| hsa-miR-16-5p   | GO:1903231 | PMID:15131085 |
| hsa-miR-16-5p   | GO:1903231 | PMID:16166262 |
| hsa-miR-16-5p   | GO:1903231 | PMID:18449891 |
| hsa-miR-16-5p   | GO:1903231 | PMID:19823025 |
| hsa-miR-16-5p   | GO:1903231 | PMID:21532615 |
| hsa-miR-16-5p   | GO:1903231 | PMID:21885851 |
| hsa-miR-16-5p   | GO:1903231 | PMID:22139073 |
| hsa-miR-16-5p   | GO:1903231 | PMID:23233752 |
| hsa-miR-16-5p   | GO:1903231 | PMID:25033200 |



|                |                       |               |
|----------------|-----------------------|---------------|
| hsa-miR-16-5p  | GO:1903231            | PMID:25261849 |
| hsa-miR-16-5p  | GO:1903231            | PMID:25594541 |
| hsa-miR-16-5p  | GO:1903231            | PMID:25743273 |
| hsa-miR-16-5p  | GO:1903588            | PMID:21885851 |
| hsa-miR-16-5p  | GO:1904848            | PMID:23233752 |
| hsa-miR-16-5p  | GO:2000134            | PMID:21454377 |
| hsa-miR-16-5p  | GO:2000134            | PMID:25261849 |
| hsa-miR-16-5p  | GO:2000545            | PMID:21885851 |
| hsa-miR-16-5p  | GO:2001244            | PMID:16166262 |
| hsa-miR-15a-5p | GO:0008285            | PMID:22139073 |
| hsa-miR-15a-5p | GO:0016525            | PMID:23233752 |
| hsa-miR-15a-5p | GO:0035195            | PMID:15131085 |
| hsa-miR-15a-5p | GO:0035195            | PMID:16166262 |
| hsa-miR-15a-5p | GO:0035195            | PMID:19823025 |
| hsa-miR-15a-5p | GO:0035195            | PMID:21454377 |
| hsa-miR-15a-5p | GO:0035195            | PMID:21532615 |
| hsa-miR-15a-5p | GO:0035195            | PMID:22139073 |
| hsa-miR-15a-5p | GO:0035195            | PMID:25261849 |
| hsa-miR-15a-5p | GO:0035195            | PMID:25594541 |
| hsa-miR-15a-5p | GO:0035195            | PMID:25743273 |
| hsa-miR-15a-5p | GO:0035278            | PMID:23233752 |
| hsa-miR-15a-5p | GO:0043065            | PMID:25261849 |
| hsa-miR-15a-5p | GO:0070062            | PMID:23233752 |
| hsa-miR-15a-5p | GO:1903231            | PMID:15131085 |
| hsa-miR-15a-5p | GO:1903231            | PMID:16166262 |
| hsa-miR-15a-5p | GO:1903231            | PMID:19823025 |
| hsa-miR-15a-5p | GO:1903231            | PMID:21532615 |
| hsa-miR-15a-5p | GO:1903231            | PMID:22139073 |
| hsa-miR-15a-5p | GO:1903231            | PMID:23233752 |
| hsa-miR-15a-5p | GO:1903231            | PMID:25261849 |
| hsa-miR-15a-5p | GO:1903231            | PMID:25594541 |
| hsa-miR-15a-5p | GO:1903231            | PMID:25743273 |
| hsa-miR-15a-5p | GO:1904706            | PMID:23233752 |
| hsa-miR-15a-5p | GO:1904753            | PMID:23233752 |
| hsa-miR-15a-5p | GO:1904848            | PMID:23233752 |
| hsa-miR-15a-5p | GO:2000134            | PMID:21454377 |
| hsa-miR-15a-5p | GO:2000134            | PMID:25261849 |
| hsa-miR-15a-5p | GO:0090650 CL:1001602 | PMID:25261849 |
| hsa-miR-15a-5p | GO:2001244            | PMID:16166262 |
| hsa-miR-543    | GO:0035195            | PMID:25465621 |

|                        |            |               |
|------------------------|------------|---------------|
| <b>hsa-miR-543</b>     | GO:1903231 | PMID:25465621 |
| <b>hsa-miR-543</b>     | GO:2000773 | PMID:25465621 |
| <b>hsa-miR-140-3p</b>  | GO:0000993 | PMID:25336585 |
| <b>hsa-miR-25-3p</b>   | GO:0035195 | PMID:19153141 |
| <b>hsa-miR-25-3p</b>   | GO:1903231 | PMID:19153141 |
| <b>hsa-miR-375</b>     | GO:0000993 | PMID:25336585 |
| <b>hsa-miR-503-5p</b>  | GO:0001937 | PMID:21220732 |
| <b>hsa-miR-503-5p</b>  | GO:0010596 | PMID:21220732 |
| <b>hsa-miR-503-5p</b>  | GO:0010812 | PMID:21220732 |
| <b>hsa-miR-503-5p</b>  | GO:0035195 | PMID:21220732 |
| <b>hsa-miR-503-5p</b>  | GO:0035278 | PMID:21220732 |
| <b>hsa-miR-503-5p</b>  | GO:1902807 | PMID:21220732 |
| <b>hsa-miR-503-5p</b>  | GO:1903231 | PMID:21220732 |
| <b>hsa-miR-503-5p</b>  | GO:1903588 | PMID:21220732 |
| <b>hsa-miR-503-5p</b>  | GO:1904706 | PMID:21220732 |
| <b>hsa-miR-503-5p</b>  | GO:1904753 | PMID:21220732 |
| <b>hsa-miR-1-5p</b>    | GO:0000993 | PMID:25336585 |
| <b>hsa-miR-103a-3p</b> | GO:0035195 | PMID:15131085 |
| <b>hsa-miR-103a-3p</b> | GO:0035195 | PMID:25033200 |
| <b>hsa-miR-103a-3p</b> | GO:1903231 | PMID:15131085 |
| <b>hsa-miR-103a-3p</b> | GO:1903231 | PMID:25033200 |
| <b>hsa-miR-24-3p</b>   | GO:0035195 | PMID:15131085 |
| <b>hsa-miR-24-3p</b>   | GO:0061049 | PMID:15131085 |
| <b>hsa-miR-24-3p</b>   | GO:0070374 | PMID:15131085 |
| <b>hsa-miR-24-3p</b>   | GO:1903231 | PMID:15131085 |
| <b>hsa-miR-208b-3p</b> | GO:0035195 | PMID:19726871 |
| <b>hsa-miR-208b-3p</b> | GO:1903231 | PMID:19726871 |
| <b>hsa-miR-199a-5p</b> | GO:0035195 | PMID:25706326 |
| <b>hsa-miR-199a-5p</b> | GO:0061049 | PMID:25706326 |
| <b>hsa-miR-199a-5p</b> | GO:1903231 | PMID:25706326 |
| <b>hsa-miR-25-5p</b>   | GO:0035195 | PMID:18728182 |
| <b>hsa-miR-25-5p</b>   | GO:1903231 | PMID:18728182 |
| <b>hsa-miR-138-5p</b>  | GO:0005634 | PMID:25336585 |
| <b>hsa-miR-138-5p</b>  | GO:0005737 | PMID:25336585 |
| <b>hsa-miR-138-5p</b>  | GO:0045944 | PMID:25336585 |
| <b>hsa-miR-15b-5p</b>  | GO:0003300 | PMID:25336585 |
| <b>hsa-miR-15b-5p</b>  | GO:0008285 | PMID:22139073 |
| <b>hsa-miR-15b-5p</b>  | GO:0030512 | PMID:22139073 |
| <b>hsa-miR-15b-5p</b>  | GO:0035195 | PMID:18449891 |
| <b>hsa-miR-15b-5p</b>  | GO:0035195 | PMID:21454377 |

|                 |            |               |
|-----------------|------------|---------------|
| hsa-miR-15b-5p  | GO:0035195 | PMID:25261849 |
| hsa-miR-15b-5p  | GO:0035195 | PMID:25594541 |
| hsa-miR-15b-5p  | GO:0035278 | PMID:25403480 |
| hsa-miR-15b-5p  | GO:0043065 | PMID:25261849 |
| hsa-miR-15b-5p  | GO:0045727 | PMID:25403480 |
| hsa-miR-15b-5p  | GO:0045930 | PMID:25403480 |
| hsa-miR-15b-5p  | GO:1903231 | PMID:18449891 |
| hsa-miR-15b-5p  | GO:1903231 | PMID:25261849 |
| hsa-miR-15b-5p  | GO:1903231 | PMID:25594541 |
| hsa-miR-15b-5p  | GO:2000134 | PMID:25261849 |
| hsa-miR-125a-5p | GO:0000993 | PMID:25336585 |
| hsa-miR-1-3p    | GO:0001934 | PMID:19131648 |
| hsa-miR-1-3p    | GO:0005615 | PMID:20159880 |
| hsa-miR-1-3p    | GO:0010460 | PMID:20159880 |
| hsa-miR-1-3p    | GO:0010614 | PMID:20159880 |
| hsa-miR-1-3p    | GO:0010614 | PMID:20159880 |
| hsa-miR-1-3p    | GO:0010614 | PMID:19933931 |
| hsa-miR-1-3p    | GO:0010880 | PMID:19131648 |
| hsa-miR-1-3p    | GO:0010881 | PMID:19131648 |
| hsa-miR-1-3p    | GO:0035195 | PMID:17397913 |
| hsa-miR-1-3p    | GO:0035195 | PMID:17401374 |
| hsa-miR-1-3p    | GO:0035195 | PMID:19131648 |
| hsa-miR-1-3p    | GO:0035195 | PMID:19933931 |
| hsa-miR-1-3p    | GO:0035195 | PMID:22880819 |
| hsa-miR-1-3p    | GO:0035195 | PMID:23157812 |
| hsa-miR-1-3p    | GO:0035195 | PMID:25995211 |
| hsa-miR-1-3p    | GO:0035278 | PMID:19933931 |
| hsa-miR-1-3p    | GO:0043569 | PMID:19933931 |
| hsa-miR-1-3p    | GO:0060044 | PMID:19933931 |
| hsa-miR-1-3p    | GO:0060373 | PMID:19933931 |
| hsa-miR-1-3p    | GO:0060412 | PMID:19933931 |
| hsa-miR-1-3p    | GO:0060452 | PMID:19933931 |
| hsa-miR-1-3p    | GO:0086094 | PMID:19131648 |
| hsa-miR-1-3p    | GO:1902260 | PMID:23157812 |
| hsa-miR-1-3p    | GO:1903231 | PMID:17397913 |
| hsa-miR-1-3p    | GO:1903231 | PMID:17401374 |
| hsa-miR-1-3p    | GO:1903231 | PMID:19131648 |
| hsa-miR-1-3p    | GO:1903231 | PMID:19933931 |
| hsa-miR-1-3p    | GO:1903231 | PMID:19933931 |
| hsa-miR-1-3p    | GO:1903231 | PMID:22880819 |

|                |                       |               |
|----------------|-----------------------|---------------|
| hsa-miR-1-3p   | GO:1903762            | PMID:22880819 |
| hsa-miR-1-3p   | GO:1903780            | PMID:22880819 |
| hsa-miR-1-3p   | GO:1904879            | PMID:19131648 |
| hsa-miR-1-3p   | GO:1905032            | PMID:23157812 |
| hsa-miR-145-5p | GO:0000993            | PMID:25336585 |
| hsa-miR-145-5p | GO:0006940            | PMID:25336585 |
| hsa-miR-145-5p | GO:0010614            | PMID:25336585 |
| hsa-miR-145-5p | GO:0071277            | PMID:25336585 |
| hsa-miR-145-5p | GO:0034599            | PMID:23028672 |
| hsa-miR-145-5p | GO:0010668            | PMID:19409607 |
| hsa-miR-145-5p | GO:0036446 CL:0002548 | PMID:19409607 |
| hsa-miR-145-5p | GO:0030036            | PMID:19409607 |
| hsa-miR-145-5p | GO:0032965            | PMID:19409607 |
| hsa-miR-145-5p | GO:0035195            | PMID:15131085 |
| hsa-miR-145-5p | GO:0035195            | PMID:19409607 |
| hsa-miR-145-5p | GO:0035195            | PMID:19915607 |
| hsa-miR-145-5p | GO:0035195            | PMID:20332243 |
| hsa-miR-145-5p | GO:0035195            | PMID:21351259 |
| hsa-miR-145-5p | GO:0035195            | PMID:22370644 |
| hsa-miR-145-5p | GO:0035195            | PMID:23028672 |
| hsa-miR-145-5p | GO:0035195            | PMID:23390502 |
| hsa-miR-145-5p | GO:0035195            | PMID:23441135 |
| hsa-miR-145-5p | GO:0035195            | PMID:24001939 |
| hsa-miR-145-5p | GO:0035195            | PMID:24065611 |
| hsa-miR-145-5p | GO:0035278            | PMID:19360360 |
| hsa-miR-145-5p | GO:0035278            | PMID:20737575 |
| hsa-miR-145-5p | GO:0071560            | PMID:20737575 |
| hsa-miR-145-5p | GO:0036446            | PMID:20737575 |
| hsa-miR-145-5p | GO:0014824            | PMID:20737575 |
| hsa-miR-145-5p | GO:0044663            | PMID:20737575 |
| hsa-miR-145-5p | GO:0048333            | PMID:19409607 |
| hsa-miR-145-5p | GO:0048662            | PMID:19409607 |
| hsa-miR-145-5p | GO:0010614            | PMID:19409607 |
| hsa-miR-145-5p | GO:0060414            | PMID:19409607 |
| hsa-miR-145-5p | GO:0010614            | PMID:19409607 |
| hsa-miR-145-5p | GO:0071560            | PMID:19409607 |
| hsa-miR-145-5p | GO:1900239            | PMID:19409607 |
| hsa-miR-145-5p | GO:1900239            | PMID:19409607 |
| hsa-miR-145-5p | GO:1903231            | PMID:15131085 |
| hsa-miR-145-5p | GO:1903231            | PMID:19360360 |

|                |                                                         |               |
|----------------|---------------------------------------------------------|---------------|
| hsa-miR-145-5p | GO:1903231                                              | PMID:19409607 |
| hsa-miR-145-5p | GO:1903231                                              | PMID:19915607 |
| hsa-miR-145-5p | GO:1903231                                              | PMID:20332243 |
| hsa-miR-145-5p | GO:1903231                                              | PMID:20737575 |
| hsa-miR-145-5p | GO:1903231                                              | PMID:21351259 |
| hsa-miR-145-5p | GO:1903231                                              | PMID:22370644 |
| hsa-miR-145-5p | GO:1903231                                              | PMID:23028672 |
| hsa-miR-145-5p | GO:1903231                                              | PMID:23390502 |
| hsa-miR-145-5p | GO:1903231                                              | PMID:23441135 |
| hsa-miR-145-5p | GO:1903231                                              | PMID:24001939 |
| hsa-miR-145-5p | GO:1904673                                              | PMID:19409607 |
| hsa-miR-145-5p | GO:1904676                                              | PMID:19409607 |
| hsa-miR-23a-3p | GO:0035195                                              | PMID:15131085 |
| hsa-miR-23a-3p | GO:0061049                                              | PMID:15131085 |
| hsa-miR-23a-3p | GO:1903231                                              | PMID:15131085 |
| hsa-miR-32-3p  | GO:0035195                                              | PMID:18728182 |
| hsa-miR-32-3p  | GO:1903231                                              | PMID:18728182 |
| hsa-miR-92a-3p | GO:0071356 ENSEMBL:ENSG00000162692                      | PMID:22267480 |
| hsa-miR-92a-3p | GO:0071356 ENSEMBL:ENSG0000007908 GO:1904997 CL:1000413 | PMID:22267480 |
| hsa-miR-92a-3p | GO:0071356 ENSEMBL:ENSG00000108691 CL:1000413           | PMID:22267480 |
| hsa-miR-92a-3p | GO:0010628                                              | PMID:24026406 |
| hsa-miR-92a-3p | GO:0010628                                              | PMID:24026406 |
| hsa-miR-92a-3p | GO:0010628                                              | PMID:24255059 |
| hsa-miR-92a-3p | GO:0010629                                              | PMID:20484043 |
| hsa-miR-92a-3p | GO:0010629                                              | PMID:22267480 |
| hsa-miR-92a-3p | GO:0032755                                              | PMID:24255059 |
| hsa-miR-92a-3p | GO:0035195                                              | PMID:19460962 |
| hsa-miR-92a-3p | GO:0035195                                              | PMID:20484043 |
| hsa-miR-92a-3p | GO:0035195                                              | PMID:20660482 |
| hsa-miR-92a-3p | GO:0035195                                              | PMID:20660482 |
| hsa-miR-92a-3p | GO:0035195                                              | PMID:20660482 |
| hsa-miR-92a-3p | GO:0035195                                              | PMID:21148309 |
| hsa-miR-92a-3p | GO:0035195                                              | PMID:21768538 |
| hsa-miR-92a-3p | GO:0035195                                              | PMID:21796614 |
| hsa-miR-92a-3p | GO:0035195                                              | PMID:22267480 |
| hsa-miR-92a-3p | GO:0035195                                              | PMID:22267480 |
| hsa-miR-92a-3p | GO:0035195                                              | PMID:22895567 |
| hsa-miR-92a-3p | GO:0035195                                              | PMID:23308108 |

|                |                                               |               |
|----------------|-----------------------------------------------|---------------|
| hsa-miR-92a-3p | GO:0035195                                    | PMID:23622248 |
| hsa-miR-92a-3p | GO:0035195                                    | PMID:24026406 |
| hsa-miR-92a-3p | GO:0035195                                    | PMID:24255059 |
| hsa-miR-92a-3p | GO:0097699 ENSEMBL:ENSG00000127528 GO:0055098 | PMID:24255059 |
| hsa-miR-92a-3p | GO:0097699 ENSEMBL:ENSG00000136826 GO:0055098 | PMID:24255059 |
| hsa-miR-92a-3p | GO:0035195                                    | PMID:24332650 |
| hsa-miR-92a-3p | GO:0035195                                    | PMID:24375836 |
| hsa-miR-92a-3p | GO:0035278                                    | PMID:23820254 |
| hsa-miR-92a-3p | GO:0035278                                    | PMID:24026406 |
| hsa-miR-92a-3p | GO:0043507                                    | PMID:24332650 |
| hsa-miR-92a-3p | GO:1903671                                    | PMID:19460962 |
| hsa-miR-92a-3p | GO:0045019                                    | PMID:21768538 |
| hsa-miR-92a-3p | GO:0050728                                    | PMID:22267480 |
| hsa-miR-92a-3p | GO:0071639                                    | PMID:24255059 |
| hsa-miR-92a-3p | GO:1903231                                    | PMID:19460962 |
| hsa-miR-92a-3p | GO:1903231                                    | PMID:20484043 |
| hsa-miR-92a-3p | GO:1903231                                    | PMID:20660482 |
| hsa-miR-92a-3p | GO:1903231                                    | PMID:20660482 |
| hsa-miR-92a-3p | GO:1903231                                    | PMID:20660482 |
| hsa-miR-92a-3p | GO:1903231                                    | PMID:21148309 |
| hsa-miR-92a-3p | GO:1903231                                    | PMID:21768538 |



|                |            |               |
|----------------|------------|---------------|
| hsa-miR-590-5p | GO:0010719 | PMID:26459119 |
| hsa-miR-590-5p | GO:0030335 | PMID:24288179 |
| hsa-miR-590-5p | GO:0035195 | PMID:23598417 |
| hsa-miR-590-5p | GO:0035195 | PMID:24288179 |
| hsa-miR-590-5p | GO:0035195 | PMID:25163461 |
| hsa-miR-590-5p | GO:0035278 | PMID:19398468 |
| hsa-miR-590-5p | GO:0045787 | PMID:24288179 |
| hsa-miR-590-5p | GO:1903231 | PMID:19398468 |
| hsa-miR-590-5p | GO:1903231 | PMID:23598417 |
| hsa-miR-590-5p | GO:1903231 | PMID:24288179 |
| hsa-miR-590-5p | GO:0055096 | PMID:26648441 |
| hsa-miR-590-5p | GO:0055096 | PMID:26648441 |
| hsa-miR-590-5p | GO:2000726 | PMID:25163461 |
| hsa-miR-155-5p | GO:0035195 | PMID:19136465 |
| hsa-miR-155-5p | GO:0035195 | PMID:21310411 |
| hsa-miR-155-5p | GO:0035195 | PMID:22387553 |
| hsa-miR-155-5p | GO:0042104 | PMID:22387553 |
| hsa-miR-155-5p | GO:0043537 | PMID:21310411 |
| hsa-miR-155-5p | GO:0050728 | PMID:21310411 |
| hsa-miR-155-5p | GO:0060354 | PMID:21310411 |
| hsa-miR-155-5p | GO:0061044 | PMID:21310411 |
| hsa-miR-155-5p | GO:1903231 | PMID:21310411 |
| hsa-miR-155-5p | GO:1903231 | PMID:25219837 |
| hsa-miR-155-5p | GO:1904995 | PMID:21310411 |
| hsa-miR-29c-3p | GO:0010629 | PMID:20570858 |
| hsa-miR-29c-3p | GO:0035195 | PMID:18390668 |
| hsa-miR-29c-3p | GO:0061754 | PMID:20570858 |
| hsa-miR-29c-3p | GO:1903231 | PMID:18390668 |
| hsa-miR-29c-3p | GO:1903231 | PMID:18390668 |



|                 |            |               |
|-----------------|------------|---------------|
| hsa-miR-29c-3p  | GO:1903231 | PMID:18390668 |
| hsa-miR-29c-3p  | GO:1903231 | PMID:20570858 |
| hsa-miR-106b-5p | GO:0035195 | PMID:18728182 |
| hsa-miR-106b-5p | GO:0035195 | PMID:26956882 |
| hsa-miR-106b-5p | GO:0035278 | PMID:19153141 |
| hsa-miR-106b-5p | GO:1903231 | PMID:18728182 |
| hsa-miR-106b-5p | GO:1903231 | PMID:19153141 |
| hsa-miR-106b-5p | GO:1903231 | PMID:26956882 |
| hsa-miR-106b-5p | GO:2000351 | PMID:26956882 |
| hsa-miR-195-5p  | GO:0003245 | PMID:26956882 |
| hsa-miR-195-5p  | GO:0003300 | PMID:26956882 |
| hsa-miR-195-5p  | GO:0010972 | PMID:26956882 |
| hsa-miR-195-5p  | GO:0045930 | PMID:26956882 |
| hsa-miR-195-5p  | GO:0061049 | PMID:26956882 |
| hsa-miR-199b-3p | GO:0000320 | PMID:26956882 |
| hsa-miR-199b-3p | GO:0060045 | PMID:26956882 |
| hsa-miR-199b-3p | GO:1905180 | PMID:26956882 |
| hsa-miR-17-5p   | GO:0003085 | PMID:26956882 |
| hsa-miR-17-5p   | GO:0003151 | PMID:26956882 |
| hsa-miR-17-5p   | GO:0010629 | PMID:22161164 |
| hsa-miR-17-5p   | GO:0034599 | PMID:22161164 |
| hsa-miR-17-5p   | GO:0035195 | PMID:20299512 |
| hsa-miR-17-5p   | GO:0035195 | PMID:20940405 |
| hsa-miR-17-5p   | GO:0035195 | PMID:20940405 |
| hsa-miR-17-5p   | GO:0035195 | PMID:20940405 |
| hsa-miR-17-5p   | GO:0035195 | PMID:21145484 |
| hsa-miR-17-5p   | GO:0035195 | PMID:23969726 |
| hsa-miR-17-5p   | GO:0035195 | PMID:25200830 |
| hsa-miR-17-5p   | GO:0035278 | PMID:19390056 |
| hsa-miR-17-5p   | GO:0045777 | PMID:19390056 |
| hsa-miR-17-5p   | GO:0045777 | PMID:19390056 |
| hsa-miR-17-5p   | GO:0045777 | PMID:19390056 |
| hsa-miR-17-5p   | GO:1901300 | PMID:19390056 |

|                |            |               |
|----------------|------------|---------------|
| hsa-miR-17-5p  | GO:1903231 | PMID:19390056 |
| hsa-miR-17-5p  | GO:1903231 | PMID:20299512 |
| hsa-miR-17-5p  | GO:1903231 | PMID:20940405 |
| hsa-miR-17-5p  | GO:1903231 | PMID:21145484 |
| hsa-miR-17-5p  | GO:1903231 | PMID:23969726 |
| hsa-miR-17-5p  | GO:1903231 | PMID:25200830 |
| hsa-miR-17-5p  | GO:1903244 | PMID:25200830 |
| hsa-miR-17-5p  | GO:1903244 | PMID:25200830 |
| hsa-miR-17-5p  | GO:1903671 | PMID:20299512 |
| hsa-miR-17-5p  | GO:1904598 | PMID:20299512 |
| hsa-miR-17-5p  | GO:1904685 | PMID:20299512 |
| hsa-miR-17-5p  | GO:1904707 | PMID:20299512 |
| hsa-miR-17-5p  | GO:1904707 | PMID:22161164 |
| hsa-miR-17-5p  | GO:1905111 | PMID:22161164 |
| hsa-miR-17-5p  | GO:1905111 | PMID:22161164 |
| hsa-miR-17-5p  | GO:1905149 | PMID:22161164 |
| hsa-miR-17-5p  | GO:1905149 | PMID:22161164 |
| hsa-miR-27a-3p | GO:0070374 | PMID:22161164 |
| hsa-miR-145-3p | GO:0035195 | PMID:24065611 |
| hsa-miR-328-3p | GO:0002027 | PMID:24065611 |
| hsa-miR-328-3p | GO:0035195 | PMID:21098446 |
| hsa-miR-328-3p | GO:1903231 | PMID:21098446 |
| hsa-miR-328-3p | GO:1904878 | PMID:21098446 |
| hsa-miR-328-3p | GO:1905001 | PMID:21098446 |
| hsa-miR-143-3p | GO:0006940 | PMID:21098446 |
| hsa-miR-143-3p | GO:0030036 | PMID:21098446 |
| hsa-miR-143-3p | GO:0032148 | PMID:21098446 |
| hsa-miR-143-3p | GO:0014824 | PMID:21098446 |
| hsa-miR-143-3p | GO:0044663 | PMID:21098446 |
| hsa-miR-143-3p | GO:0048662 | PMID:21098446 |
| hsa-miR-143-3p | GO:0051897 | PMID:21098446 |
| hsa-miR-143-3p | GO:0060414 | PMID:21098446 |
| hsa-miR-143-3p | GO:1900239 | PMID:21098446 |
| hsa-miR-143-3p | GO:2001274 | PMID:21098446 |
| hsa-miR-29b-3p | GO:0010628 | PMID:19956414 |
| hsa-miR-29b-3p | GO:0010628 | PMID:19956414 |
| hsa-miR-29b-3p | GO:0010628 | PMID:22269326 |
| hsa-miR-29b-3p | GO:0010629 | PMID:19956414 |
| hsa-miR-29b-3p | GO:0010629 | PMID:19956414 |
| hsa-miR-29b-3p | GO:0010629 | PMID:19956414 |

|                |                       |               |
|----------------|-----------------------|---------------|
| hsa-miR-29b-3p | GO:0010629            | PMID:19956414 |
| hsa-miR-29b-3p | GO:0010629            | PMID:20570858 |
| hsa-miR-29b-3p | GO:0032966            | PMID:19913496 |
| hsa-miR-29b-3p | GO:0032966            | PMID:22269326 |
| hsa-miR-29b-3p | GO:0032966            | PMID:23221517 |
| hsa-miR-29b-3p | GO:0035195            | PMID:19913496 |
| hsa-miR-29b-3p | GO:0035195            | PMID:19913496 |
| hsa-miR-29b-3p | GO:0035195            | PMID:19956414 |
| hsa-miR-29b-3p | GO:0035195            | PMID:20570858 |
| hsa-miR-29b-3p | GO:0035195            | PMID:20657750 |
| hsa-miR-29b-3p | GO:0035195            | PMID:20657750 |
| hsa-miR-29b-3p | GO:0035195            | PMID:20657750 |
| hsa-miR-29b-3p | GO:0035195            | PMID:22269326 |
| hsa-miR-29b-3p | GO:0035195            | PMID:22269326 |
| hsa-miR-29b-3p | GO:0035195            | PMID:23221517 |
| hsa-miR-29b-3p | GO:0035195            | PMID:23221517 |
| hsa-miR-29b-3p | GO:0035278            | PMID:17404574 |
| hsa-miR-29b-3p | GO:0035278            | PMID:20657750 |
| hsa-miR-29b-3p | GO:0043065            | PMID:17404574 |
| hsa-miR-29b-3p | GO:0060312            | PMID:22269326 |
| hsa-miR-29b-3p | GO:0061754            | PMID:20570858 |
| hsa-miR-29b-3p | GO:1903845 CL:0002547 | PMID:22269326 |
| hsa-miR-29b-3p | GO:1903202            | PMID:19956414 |
| hsa-miR-29b-3p | GO:1903231            | PMID:17404574 |
| hsa-miR-29b-3p | GO:1903231            | PMID:19913496 |
| hsa-miR-29b-3p | GO:1903231            | PMID:19913496 |
| hsa-miR-29b-3p | GO:1903231            | PMID:19956414 |
| hsa-miR-29b-3p | GO:1903231            | PMID:19956414 |
| hsa-miR-29b-3p | GO:1903231            | PMID:19956414 |
| hsa-miR-29b-3p | GO:1903231            | PMID:20657750 |

|                  |            |               |
|------------------|------------|---------------|
| hsa-miR-29b-3p   | GO:1903231 | PMID:20657750 |
| hsa-miR-29b-3p   | GO:1903231 | PMID:20657750 |
| hsa-miR-29b-3p   | GO:1903231 | PMID:23221517 |
| hsa-miR-29b-3p   | GO:1903231 | PMID:23221517 |
| hsa-miR-29b-3p   | GO:1903845 | PMID:22269326 |
| hsa-miR-29b-3p   | GO:1905041 | PMID:23221517 |
| hsa-miR-33a-3p   | GO:0000993 | PMID:25336585 |
| hsa-miR-297      | GO:0000993 | PMID:25336585 |
| hsa-miR-1-3p     | GO:0010881 | PMID:25336585 |
| hsa-miR-92a-1-5p | GO:0005737 | PMID:25336585 |
| hsa-miR-92a-1-5p | GO:0035195 | PMID:25095974 |
| hsa-miR-92a-1-5p | GO:0045944 | PMID:25336585 |
| hsa-miR-92a-1-5p | GO:1903231 | PMID:25095974 |

## REFERENCES

113. Sunami, Y., Leithauser, F., Gul, S., Fiedler, K., Guldiken, N., Espenlaub, S., Holzmann, K.H., Hipp, N., Sindrilaru, A., Luedde, T. *et al.* (2012) Hepatic activation of IKK/NFkappaB signaling induces liver fibrosis via macrophage-mediated chronic inflammation. *Hepatology*, **56**, 1117-1128.
114. Kato, H., Takahasi, K. and Fujita, T. (2011) RIG-I-like receptors: cytoplasmic sensors for non-self RNA. *Immunol Rev*, **243**, 91-98.
115. Sonkoly, E., Wei, T., Janson, P.C., Saaf, A., Lundeberg, L., Tengvall-Linder, M., Norstedt, G., Alenius, H., Homey, B., Scheynius, A. *et al.* (2007) MicroRNAs: novel regulators involved in the pathogenesis of psoriasis? *PLoS One*, **2**, e610.
116. Chen, Z., Shao, Y. and Li, X. (2015) The roles of signaling pathways in epithelial-to-mesenchymal transition of PVR. *Mol Vis*, **21**, 706-710.
117. Lovisa, S., LeBleu, V.S., Tampe, B., Sugimoto, H., Vadhagara, K., Carstens, J.L., Wu, C.C., Hagos, Y., Burckhardt, B.C., Pentcheva-Hoang, T. *et al.* (2015) Epithelial-to-mesenchymal transition induces cell cycle arrest and parenchymal damage in renal fibrosis. *Nat Med*, **21**, 998-1009.
118. Larue, L. and Bellacosa, A. (2005) Epithelial-mesenchymal transition in development and cancer: role of phosphatidylinositol 3' kinase/AKT pathways. *Oncogene*, **24**, 7443-7454.
119. Kalluri, R. and Weinberg, R.A. (2009) The basics of epithelial-mesenchymal transition. *J Clin Invest*, **119**, 1420-1428.
120. Park, S.M., Gaur, A.B., Lengyel, E. and Peter, M.E. (2008) The miR-200 family determines the epithelial phenotype of cancer cells by targeting the E-cadherin repressors ZEB1 and ZEB2. *Genes Dev*, **22**, 894-907.
121. Korpala, M., Lee, E.S., Hu, G. and Kang, Y. (2008) The miR-200 family inhibits epithelial-mesenchymal transition and cancer cell migration by direct targeting of E-cadherin transcriptional repressors ZEB1 and ZEB2. *J Biol Chem*, **283**, 14910-14914.
122. Zeisberg, M. and Neilson, E.G. (2009) Biomarkers for epithelial-mesenchymal transitions. *J Clin Invest*, **119**, 1429-1437.
123. Bell, C.E. and Watson, A.J. (2009) SNAI1 and SNAI2 are asymmetrically expressed at the 2-cell stage and become segregated to the TE in the mouse blastocyst. *PLoS One*, **4**, e8530.

124. Barrallo-Gimeno, A. and Nieto, M.A. (2005) The Snail genes as inducers of cell movement and survival: implications in development and cancer. *Development*, **132**, 3151-3161.
125. Shirakihara, T., Saitoh, M. and Miyazono, K. (2007) Differential regulation of epithelial and mesenchymal markers by deltaEF1 proteins in epithelial mesenchymal transition induced by TGF-beta. *Mol Biol Cell*, **18**, 3533-3544.
126. Wang, H., Wang, R., Thrimawithana, T., Little, P.J., Xu, J., Feng, Z.P. and Zheng, W. (2014) The nerve growth factor signaling and its potential as therapeutic target for glaucoma. *Biomed Res Int*, **2014**, 759473.
127. Eleftheriadis, T., Pissas, G., Liakopoulos, V., Stefanidis, I. and Lawson, B.R. (2012) Toll-like receptors and their role in renal pathologies. *Inflamm Allergy Drug Targets*, **11**, 464-477.
128. Xiong, M., Jiang, L., Zhou, Y., Qiu, W., Fang, L., Tan, R., Wen, P. and Yang, J. (2012) The miR-200 family regulates TGF-beta1-induced renal tubular epithelial to mesenchymal transition through Smad pathway by targeting ZEB1 and ZEB2 expression. *Am J Physiol Renal Physiol*, **302**, F369-379.
129. Taganov, K.D., Boldin, M.P., Chang, K.J. and Baltimore, D. (2006) NF-kappaB-dependent induction of microRNA miR-146, an inhibitor targeted to signaling proteins of innate immune responses. *Proc Natl Acad Sci U S A*, **103**, 12481-12486.
130. Schulte, L.N., Westermann, A.J. and Vogel, J. (2013) Differential activation and functional specialization of miR-146 and miR-155 in innate immune sensing. *Nucleic Acids Res*, **41**, 542-553.
131. Xu, T., Zhu, Y., Wei, Q.K., Yuan, Y., Zhou, F., Ge, Y.Y., Yang, J.R., Su, H. and Zhuang, S.M. (2008) A functional polymorphism in the miR-146a gene is associated with the risk for hepatocellular carcinoma. *Carcinogenesis*, **29**, 2126-2131.
132. Cui, J.G., Li, Y.Y., Zhao, Y., Bhattacharjee, S. and Lukiw, W.J. (2010) Differential regulation of interleukin-1 receptor-associated kinase-1 (IRAK-1) and IRAK-2 by microRNA-146a and NF-kappaB in stressed human astroglial cells and in Alzheimer disease. *J Biol Chem*, **285**, 38951-38960.
133. Baruch, K., Rosenzweig, N., Kertser, A., Deczkowska, A., Sharif, A.M., Spinrad, A., Tsitsou-Kampeli, A., Sarel, A., Cahalon, L. and Schwartz, M. (2015) Breaking immune tolerance by targeting Foxp3(+) regulatory T cells mitigates Alzheimer's disease pathology. *Nat Commun*, **6**, 7967.
134. Pauley, K.M. and Cha, S. (2011) miRNA-146a in rheumatoid arthritis: a new therapeutic strategy. *Immunotherapy*, **3**, 829-831.
135. Robertson, E.D., Wasylyk, C., Ye, T., Jung, A.C. and Wasylyk, B. (2014) The oncogenic MicroRNA Hsa-miR-155-5p targets the transcription factor ELK3 and links it to the hypoxia response. *PLoS One*, **9**, e113050.
136. Leah, E. (2011) Rheumatoid arthritis: miR-155 mediates inflammation. *Nat Rev Rheumatol*, **7**, 437.
137. Kurowska-Stolarska, M., Alivernini, S., Ballantine, L.E., Asquith, D.L., Millar, N.L., Gilchrist, D.S., Reilly, J., Ierna, M., Fraser, A.R., Stolarski, B. *et al.* (2011) MicroRNA-155 as a proinflammatory regulator in clinical and experimental arthritis. *Proc Natl Acad Sci U S A*, **108**, 11193-11198.
138. Faraoni, I., Antonetti, F.R., Cardone, J. and Bonmassar, E. (2009) miR-155 gene: a typical multifunctional microRNA. *Biochim Biophys Acta*, **1792**, 497-505.
139. Eis, P.S., Tam, W., Sun, L., Chadburn, A., Li, Z., Gomez, M.F., Lund, E. and Dahlberg, J.E. (2005) Accumulation of miR-155 and BIC RNA in human B cell lymphomas. *Proc Natl Acad Sci U S A*, **102**, 3627-3632.
140. Bhattacharyya, S., Balakathiresan, N.S., Dalgard, C., Gutti, U., Armistead, D., Jozwik, C., Srivastava, M., Pollard, H.B. and Biswas, R. (2011) Elevated miR-155 promotes inflammation in cystic fibrosis by driving hyperexpression of interleukin-8. *J Biol Chem*, **286**, 11604-11615.
141. Bhattacharyya, S., Kumar, P., Tsuchiya, M., Bhattacharyya, A. and Biswas, R. (2013) Regulation of miR-155 biogenesis in cystic fibrosis lung epithelial cells: antagonistic role

- of two mRNA-destabilizing proteins, KSRP and TTP. *Biochem Biophys Res Commun*, **433**, 484-488.
142. Ferraro, A., Kontos, C.K., Boni, T., Bantounas, I., Siakouli, D., Kosmidou, V., Vlasi, M., Spyridakis, Y., Tsipras, I., Zografos, G. *et al.* (2014) Epigenetic regulation of miR-21 in colorectal cancer: ITGB4 as a novel miR-21 target and a three-gene network (miR-21-ITGBeta4-PDCD4) as predictor of metastatic tumor potential. *Epigenetics*, **9**, 129-141.
  143. Frankel, L.B., Christoffersen, N.R., Jacobsen, A., Lindow, M., Krogh, A. and Lund, A.H. (2008) Programmed cell death 4 (PDCD4) is an important functional target of the microRNA miR-21 in breast cancer cells. *J Biol Chem*, **283**, 1026-1033.
  144. Najafi, Z., Sharifi, M. and Javadi, G. (2015) Degradation of miR-21 induces apoptosis and inhibits cell proliferation in human hepatocellular carcinoma. *Cancer Gene Ther*, **22**, 530-535.
  145. Thum, T., Gross, C., Fiedler, J., Fischer, T., Kissler, S., Bussen, M., Galuppo, P., Just, S., Rottbauer, W., Frantz, S. *et al.* (2008) MicroRNA-21 contributes to myocardial disease by stimulating MAP kinase signalling in fibroblasts. *Nature*, **456**, 980-984.
  146. Wolfe, F. and Michaud, K. (2004) Heart failure in rheumatoid arthritis: rates, predictors, and the effect of anti-tumor necrosis factor therapy. *Am J Med*, **116**, 305-311.
  147. Sayed, D., Hong, C., Chen, I.Y., Lypowy, J. and Abdellatif, M. (2007) MicroRNAs play an essential role in the development of cardiac hypertrophy. *Circ Res*, **100**, 416-424.
  148. Song, S., Zhou, J., He, S., Zhu, D., Zhang, Z., Zhao, H., Wang, Y. and Li, D. (2013) Expression levels of microRNA-375 in pancreatic cancer. *Biomed Rep*, **1**, 393-398.
  149. Zhou, J., Song, S., Cen, J., Zhu, D., Li, D. and Zhang, Z. (2012) MicroRNA-375 is downregulated in pancreatic cancer and inhibits cell proliferation in vitro. *Oncol Res*, **20**, 197-203.
  150. Avissar, M., Christensen, B.C., Kelsey, K.T. and Marsit, C.J. (2009) MicroRNA expression ratio is predictive of head and neck squamous cell carcinoma. *Clin Cancer Res*, **15**, 2850-2855.
  151. Lee, D.E., Brown, J.L., Rosa, M.E., Brown, L.A., Perry, R.A., Jr., Wiggs, M.P., Nilsson, M.I., Crouse, S.F., Fluckey, J.D., Washington, T.A. *et al.* (2015) microRNA-16 Is Downregulated During Insulin Resistance and Controls Skeletal Muscle Protein Accretion. *J Cell Biochem*.
  152. Ferrando-Martinez, S., Ruiz-Mateos, E., Dudakov, J.A., Velardi, E., Grillari, J., Kreil, D.P., Munoz-Fernandez, M.A., van den Brink, M.R. and Leal, M. (2015) WNT signaling suppression in the senescent human thymus. *J Gerontol A Biol Sci Med Sci*, **70**, 273-281.
  153. Hackl, M., Brunner, S., Fortschegger, K., Schreiner, C., Micutkova, L., Muck, C., Laschober, G.T., Lepperdinger, G., Sampson, N., Berger, P. *et al.* (2010) miR-17, miR-19b, miR-20a, and miR-106a are down-regulated in human aging. *Aging Cell*, **9**, 291-296.
  154. Chow, J.C., Yen, Z., Ziesche, S.M. and Brown, C.J. (2005) Silencing of the mammalian X chromosome. *Annu Rev Genomics Hum Genet*, **6**, 69-92.
  155. Nguyen, D.K. and Disteche, C.M. (2006) Dosage compensation of the active X chromosome in mammals. *Nat Genet*, **38**, 47-53.
  156. Young, J.I. and Zoghbi, H.Y. (2004) X-chromosome inactivation patterns are unbalanced and affect the phenotypic outcome in a mouse model of rett syndrome. *Am J Hum Genet*, **74**, 511-520.
  157. Becker, P.B. and Workman, J.L. (2013) Nucleosome remodeling and epigenetics. *Cold Spring Harb Perspect Biol*, **5**.
  158. Tarpey, P.S., Smith, R., Pleasance, E., Whibley, A., Edkins, S., Hardy, C., O'Meara, S., Latimer, C., Dicks, E., Menzies, A. *et al.* (2009) A systematic, large-scale resequencing screen of X-chromosome coding exons in mental retardation. *Nat Genet*, **41**, 535-543.
  159. Kaufman, L., Ayub, M. and Vincent, J.B. (2010) The genetic basis of non-syndromic intellectual disability: a review. *J Neurodev Disord*, **2**, 182-209.
  160. Disteche, C.M. (2012) Dosage compensation of the sex chromosomes. *Annu Rev Genet*, **46**, 537-560.
  161. Prestel, M., Feller, C. and Becker, P.B. (2010) Dosage compensation and the global re-balancing of aneuploid genomes. *Genome Biol*, **11**, 216.

162. Bannon, J.H. and Mc Gee, M.M. (2009) Understanding the role of aneuploidy in tumorigenesis. *Biochem Soc Trans*, **37**, 910-913.
163. Lu, X., Fang, Y., Wang, Z., Xie, J., Zhan, Q., Deng, X., Chen, H., Jin, J., Peng, C., Li, H. *et al.* (2013) Downregulation of gas5 increases pancreatic cancer cell proliferation by regulating CDK6. *Cell Tissue Res*, **354**, 891-896.
164. Kino, T., Hurt, D.E., Ichijo, T., Nader, N. and Chrousos, G.P. (2010) Noncoding RNA gas5 is a growth arrest- and starvation-associated repressor of the glucocorticoid receptor. *Sci Signal*, **3**, ra8.
165. Mourtada-Maarabouni, M., Pickard, M.R., Hedge, V.L., Farzaneh, F. and Williams, G.T. (2009) GAS5, a non-protein-coding RNA, controls apoptosis and is downregulated in breast cancer. *Oncogene*, **28**, 195-208.
166. Zhou, W., Tao, Z., Wang, Z., Hu, W., Shen, M., Zhou, L., Wen, Z., Yu, Z., Wu, X., Huang, K. *et al.* (2014) Long noncoding RNA PCA3 gene promoter region is related to the risk of prostate cancer on Chinese males. *Exp Mol Pathol*, **97**, 550-553.
167. Takahashi, Y., Sawada, G., Kurashige, J., Uchi, R., Matsumura, T., Ueo, H., Takano, Y., Eguchi, H., Sudo, T., Sugimachi, K. *et al.* (2014) Amplification of PVT-1 is involved in poor prognosis via apoptosis inhibition in colorectal cancers. *Br J Cancer*, **110**, 164-171.
168. Alvarez, M.L. and DiStefano, J.K. (2011) Functional characterization of the plasmacytoma variant translocation 1 gene (PVT1) in diabetic nephropathy. *PLoS One*, **6**, e18671.
169. Guan, Y., Kuo, W.L., Stilwell, J.L., Takano, H., Lapuk, A.V., Fridlyand, J., Mao, J.H., Yu, M., Miller, M.A., Santos, J.L. *et al.* (2007) Amplification of PVT1 contributes to the pathophysiology of ovarian and breast cancer. *Clin Cancer Res*, **13**, 5745-5755.
170. Ng, S.Y., Bogu, G.K., Soh, B.S. and Stanton, L.W. (2013) The long noncoding RNA RMST interacts with SOX2 to regulate neurogenesis. *Mol Cell*, **51**, 349-359.
171. Martens-Uzunova, E.S., Bottcher, R., Croce, C.M., Jenster, G., Visakorpi, T. and Calin, G.A. (2014) Long noncoding RNA in prostate, bladder, and kidney cancer. *Eur Urol*, **65**, 1140-1151.
172. Ariel, I., Sughayer, M., Fellig, Y., Pizov, G., Ayesh, S., Podeh, D., Libdeh, B.A., Levy, C., Birman, T., Tykocinski, M.L. *et al.* (2000) The imprinted H19 gene is a marker of early recurrence in human bladder carcinoma. *Mol Pathol*, **53**, 320-323.
173. Matouk, I.J., DeGroot, N., Mezan, S., Ayesh, S., Abu-lail, R., Hochberg, A. and Galun, E. (2007) The H19 non-coding RNA is essential for human tumor growth. *PLoS One*, **2**, e845.
174. Gabory, A., Jammes, H. and Dandolo, L. (2010) The H19 locus: role of an imprinted non-coding RNA in growth and development. *Bioessays*, **32**, 473-480.
175. Yap, K.L., Li, S., Munoz-Cabello, A.M., Raguz, S., Zeng, L., Mujtaba, S., Gil, J., Walsh, M.J. and Zhou, M.M. (2010) Molecular interplay of the noncoding RNA ANRIL and methylated histone H3 lysine 27 by polycomb CBX7 in transcriptional silencing of INK4a. *Mol Cell*, **38**, 662-674.
176. Chen, D., Zhang, Z., Mao, C., Zhou, Y., Yu, L., Yin, Y., Wu, S., Mou, X. and Zhu, Y. (2014) ANRIL inhibits p15(INK4b) through the TGFbeta1 signaling pathway in human esophageal squamous cell carcinoma. *Cell Immunol*, **289**, 91-96.
177. Pasmant, E., Sabbagh, A., Vidaud, M. and Bieche, I. (2011) ANRIL, a long, noncoding RNA, is an unexpected major hotspot in GWAS. *Faseb j*, **25**, 444-448.
178. Martinez-Fernandez, M., Feber, A., Duenas, M., Segovia, C., Rubio, C., Fernandez, M., Villacampa, F., Duarte, J., Lopez-Calderon, F.F., Gomez-Rodriguez, M.J. *et al.* (2015) Analysis of the Polycomb-related lncRNAs HOTAIR and ANRIL in bladder cancer. *Clin Epigenetics*, **7**, 109.
179. Iranpour, M., Soudyab, M., Geranpayeh, L., Mirfakhraie, R., Azargashb, E., Movafagh, A. and Ghafouri-Fard, S. (2016) Expression analysis of four long noncoding RNAs in breast cancer. *Tumour Biol*, **37**, 2933-2940.
180. Wang, J., Shao, N., Ding, X., Tan, B., Song, Q., Wang, N., Jia, Y., Ling, H. and Cheng, Y. (2016) Crosstalk between transforming growth factor-beta signaling pathway and long non-coding RNAs in cancer. *Cancer Lett*, **370**, 296-301.

181. Holdt, L.M., Hoffmann, S., Sass, K., Langenberger, D., Scholz, M., Krohn, K., Finstermeier, K., Stahringer, A., Wilfert, W., Beutner, F. *et al.* (2013) Alu elements in ANRIL non-coding RNA at chromosome 9p21 modulate atherogenic cell functions through trans-regulation of gene networks. *PLoS Genet*, **9**, e1003588.
182. Fan, M., Li, X., Jiang, W., Huang, Y., Li, J. and Wang, Z. (2013) A long non-coding RNA, PTCSC3, as a tumor suppressor and a target of miRNAs in thyroid cancer cells. *Exp Ther Med*, **5**, 1143-1146.
